# Supplementary material
Source: MDPI journal article supplement (https://www.mdpi.com/2504-446X/3/1/10)
Supplement: s1 [file s1]

Table S1. List of studies

| cite | Country      | category                                        | place                                     | protected.area | figure.protection                                                                                                         | IUCN           | english.designation                  |
|------|--------------|-------------------------------------------------|-------------------------------------------|----------------|---------------------------------------------------------------------------------------------------------------------------|----------------|--------------------------------------|
| [1]  | USA          | Wildlife Research and Management                | Goodwin Wildlife Management Area          | Yes            | Wildlife Management Area                                                                                                  |                |                                      |
| [2]  | USA          | Environmental management and emergency response |                                           | No             |                                                                                                                           |                |                                      |
| [3]  | USA          | Wildlife Research and Management                | Admiralty Bay                             | No             |                                                                                                                           |                |                                      |
| [4]  | USA          | Wildlife Research and Management                | Gulf of California                        | No             |                                                                                                                           |                |                                      |
| [5]  | USA          | Wildlife Research and Management                | National Bison Range                      | Yes            | National Wildlife Refuge                                                                                                  | IV             |                                      |
| [6]  | Australia    | Wildlife Research and Management                |                                           | No             |                                                                                                                           |                |                                      |
| [7]  | Portugal     | Environmental management and emergency response |                                           | No             |                                                                                                                           |                |                                      |
| [8]  | China        | Environmental management and emergency response | Taiwan Island                             | No             |                                                                                                                           |                |                                      |
| [9]  | USA          | Ecosystem monitoring                            | Jornada Experimental Range                | No             |                                                                                                                           |                |                                      |
| [10] | Canada       | Wildlife Research and Management                |                                           | No             |                                                                                                                           |                |                                      |
| [11] | Spain        | Wildlife Research and Management                | Estany d'Ivars i Vila-Sana                | Yes            | Nature 2000: Zonas Especiales de Conservación (ZEC), Red Natura 2000: Zonas Especiales de Protección para las Aves (ZEPA) | Not Applicable |                                      |
| [12] | Spain        | Wildlife Research and Management                | Doñana National Park                      | Yes            | National Park                                                                                                             | Not Applicable |                                      |
| [13] | Germany      | Wildlife Research and Management                |                                           | No             |                                                                                                                           |                |                                      |
| [14] | Germany      | Ecosystem monitoring                            | Hainich National Park                     | Yes            | National Park                                                                                                             | II             |                                      |
| [15] | Indonesia    | Ecosystem monitoring                            | Gunung Leuser National Park               | Yes            | National Park                                                                                                             | Not Applicable |                                      |
| [16] | Morocco      | Environmental management and emergency response | Taroudant, Souss-Massa-Drâa               | Yes            | National Park                                                                                                             | II             | Regional/Provincial Nature Park      |
| [17] | Spain        | Wildlife Research and Management                | Doñana National Park                      | Yes            | National Park                                                                                                             | Not Applicable | National Park                        |
| [18] | Australia    | Wildlife Research and Management                | Shark Bay                                 | Yes            | Marine Park, World Heritage Area (WHA)                                                                                    | II             | Marine Park                          |
| [19] | Ghana        | Wildlife Research and Management                | Nazinga Game Ranch                        | Yes            | National Wildlife Park                                                                                                    |                |                                      |
| [20] | Belgium      | Ecosystem monitoring                            | Fellenne                                  | No             |                                                                                                                           |                |                                      |
| [21] | France       | Ecosystem monitoring                            | Zone Atelier Armorique                    | No             |                                                                                                                           |                |                                      |
| [22] | Canada       | Ecosystem monitoring                            | Baie-du-Febvre                            | No             |                                                                                                                           |                |                                      |
| [23] | Sweden       | Ecosystem monitoring                            | Balingstrasket                            | No             |                                                                                                                           |                |                                      |
| [24] | Germany      | Ecosystem monitoring                            | Uchter Moor                               | Yes            | Nature Reserve                                                                                                            | IV             |                                      |
| [25] | South Africa | Law enforcement                                 | KwaZulu-Nata                              | Yes            | Bird Sanctuary                                                                                                            | IV             | Nature Reserve                       |
| [26] | Canada       | Wildlife Research and Management                | St. Lawrence River                        | No             |                                                                                                                           |                | Bird Sanctuary                       |
| [27] | Spain        | Wildlife Research and Management                | Doñana National Park                      | Yes            | National Park                                                                                                             | Not Applicable |                                      |
| [28] | Japan        | Ecosystem monitoring                            | Ogawa Forest Reserve                      | Yes            | Forest Reserve                                                                                                            | V              |                                      |
| [29] | Turkey       | Ecosystem monitoring                            | Kahramanmaras Sütçü Imam University (KSU) | No             |                                                                                                                           |                | Prefectural Nature Conservation Area |

|      |             |                                                 |                                                                        |     |                                                                                                             |                |                          |
|------|-------------|-------------------------------------------------|------------------------------------------------------------------------|-----|-------------------------------------------------------------------------------------------------------------|----------------|--------------------------|
| [30] | Germany     | Ecosystem monitoring                            | Hainich-Dün                                                            | Yes | National Park, Special Protection Area (Birds Directive), Site of Community Importance (Habitats Directive) | II             |                          |
| [31] | USA         | Ecosystem monitoring                            | Kohrs Fishing Access (FAS)                                             | No  |                                                                                                             |                |                          |
| [32] | Japan       | Ecosystem monitoring                            | Niida River estuary                                                    | No  |                                                                                                             |                |                          |
| [33] | Switzerland | Wildlife Research and Management                |                                                                        | No  |                                                                                                             |                |                          |
| [34] | Sweden      | Environmental management and emergency response | Vormbäcken River                                                       | No  |                                                                                                             |                |                          |
| [35] | Malaysia    | Environmental management and emergency response |                                                                        | No  |                                                                                                             |                |                          |
| [36] | Italy       | Environmental management and emergency response | Borghetto Santo Spirito                                                | No  |                                                                                                             |                |                          |
| [37] | USA         | Environmental management and emergency response | Santa Rita Experimental Range (SRER), Jornada Experimental Range (JER) | No  |                                                                                                             |                |                          |
| [38] | Peru        | Ecosystem monitoring                            | Huascaran National Park                                                | Yes | National Park                                                                                               | II             |                          |
| [39] | Japan       | Environmental management and emergency response | Nishinoshima volcano                                                   | No  |                                                                                                             |                | National Park            |
| [40] | Sweden      | Wildlife Research and Management                |                                                                        | No  |                                                                                                             |                |                          |
| [41] | Antarctica  | Wildlife Research and Management                | Volunteer Point                                                        | No  |                                                                                                             |                |                          |
| [42] | South Korea | Wildlife Research and Management                | Chiaksan National Park, Taeanhaean National Park                       | Yes | National Park                                                                                               | II             |                          |
| [43] |             | Law enforcement                                 |                                                                        | No  |                                                                                                             |                | National Park            |
| [44] | Spain       | Wildlife Research and Management                | Doñana National Park                                                   | Yes | National Park                                                                                               | Not Applicable |                          |
| [45] | UK          | Wildlife Research and Management                | Devon                                                                  | Yes | Private Nature Reserve                                                                                      |                |                          |
| [46] | USA         | Wildlife Research and Management                | Ruby Lake NWR, Tomales Bay                                             | Yes | National Wildlife Refuge                                                                                    | IV             |                          |
| [47] | Gabon       | Wildlife Research and Management                | Loango National Park                                                   | Yes | National Park                                                                                               | Not Reported   | National Wildlife Refuge |
| [48] | Canada      | Wildlife Research and Management                | Roberts Bank                                                           | Yes | wildlife management area                                                                                    | IV             | National Park            |
| [49] | Canada      | Wildlife Research and Management                | Tern Islands                                                           | Yes | Parks Canada                                                                                                |                | Wildlife Management Area |
| [50] | Congo       | Wildlife Research and Management                | Garamba National Park                                                  | Yes | National Park                                                                                               | II             |                          |
| [51] | France      | Wildlife Research and Management                | Zoo du Lunaret, Montpellier, Cros Martin                               | Yes | national seaside and lakeside conservancy                                                                   |                | National Park            |
| [52] | Canada      | Wildlife Research and Management                | Igloolik Island                                                        | No  |                                                                                                             |                |                          |
| [53] | USA         | Wildlife Research and Management                | Upper Clark Fork, Bitterroot Rivers                                    | No  |                                                                                                             |                |                          |
| [54] | Congo       | Wildlife Research and Management                | Garamba National Park                                                  | Yes | National Park                                                                                               | II             |                          |
| [55] | China       | Wildlife Research and Management                | Taijiang National Park                                                 | Yes | National Park                                                                                               | II             | National Park            |
| [56] | Canada      | Wildlife Research and Management                | Falardeau Wildlife Observation and Agricultural Interpretive           | No  |                                                                                                             |                | National Park            |

|      |            |                                                 |                                            |     |                                             |              |                                                   |
|------|------------|-------------------------------------------------|--------------------------------------------|-----|---------------------------------------------|--------------|---------------------------------------------------|
| [57] | Finland    | Ecosystem monitoring                            | Vesijako research forest area              | Yes | Research forest area                        | Not Reported |                                                   |
| [58] | Norway     | Ecosystem monitoring                            |                                            | No  |                                             |              | Site of Community Importance (Habitats Directive) |
| [59] | USA        | Ecosystem monitoring                            |                                            | No  |                                             |              |                                                   |
| [60] | Finland    | Ecosystem monitoring                            | Lahti                                      | Yes | Private Nature Reserve                      | Not Reported |                                                   |
| [61] | Costa Rica | Ecosystem monitoring                            | Las Cruces Biological Station              | No  |                                             |              | Private Nature Reserve                            |
| [62] | USA        | Ecosystem monitoring                            | Papahānaumokuākea Marine National Monument | Yes | Marine National Monument                    | Ia           |                                                   |
| [63] | China      | Ecosystem monitoring                            | Tain-Pu reservoir                          | Yes | Reservoir                                   |              | Marine National Monument                          |
| [64] | USA        | Ecosystem monitoring                            | Water Conservation Area 3A                 | Yes | Water Conservation Area                     |              |                                                   |
| [65] | USA        | Wildlife Research and Management                |                                            | No  |                                             |              |                                                   |
| [66] | Belgium    | Ecosystem monitoring                            | Grand-Leez                                 | No  |                                             |              |                                                   |
| [67] | Canada     | Ecosystem monitoring                            | Lake Erie                                  | No  |                                             |              |                                                   |
| [68] | Antarctica | Wildlife Research and Management                | Cape Shirreff                              | Yes | Site of Special Scientific Interest (SSSI)  | Ia           |                                                   |
| [69] | Canada     | Wildlife Research and Management                | Vancouver Island                           | No  |                                             |              | Site of Special Scientific Interest (SSSI)        |
| [70] | USA        | Environmental management and emergency response | Sandpit Lakes                              | No  |                                             |              |                                                   |
| [71] | Malaysia   | Wildlife Research and Management                | Sabah                                      | No  |                                             |              |                                                   |
| [72] | Hungary    | Environmental management and emergency response | Bakony Mountains                           | No  |                                             |              |                                                   |
| [73] | Canada     | Environmental management and emergency response | Elbow river                                | No  |                                             |              |                                                   |
| [74] | USA        | Wildlife Research and Management                |                                            | No  |                                             |              |                                                   |
| [75] | Italy      | Environmental management and emergency response | Trentola Ducenta                           | No  |                                             |              |                                                   |
| [76] | Portugal   | Ecosystem monitoring                            |                                            | No  |                                             |              |                                                   |
| [77] | Cyprus     | Ecotourism                                      |                                            | No  |                                             |              |                                                   |
| [78] | China      | Environmental management and emergency response |                                            | No  |                                             |              |                                                   |
| [79] | USA        | Ecosystem monitoring                            |                                            | No  |                                             |              |                                                   |
| [80] | Germany    | Ecosystem monitoring                            | Haus Riswick                               | No  |                                             |              |                                                   |
| [81] | Australia  | Wildlife Research and Management                | Christmas Island National Park             | Yes | National Park                               | Ia, II       |                                                   |
| [82] | USA        | Wildlife Research and Management                | Rockefeller Wildlife Refuge                | Yes | Wildlife Refuge                             | V            | Nature Reserve                                    |
| [84] | Indonesia  | Wildlife Research and Management                | Leuser Ecosystem                           | Yes | National Park, UNESCO-MAB Biosphere Reserve |              |                                                   |
| [85] | Germany    | Wildlife Research and Management                | Dietersheimer Brenne                       | No  |                                             |              |                                                   |
| [86] | Canada     | Wildlife Research and Management                | Goose Bay, Labrador                        | No  |                                             |              |                                                   |
| [87] | Australia  | Wildlife Research and Management                | Adele Island                               | Yes | Nature Reserve                              | Ia           |                                                   |
| [88] | Australia  | Wildlife Research and Management                | Sunshine Coast                             | No  |                                             |              | Nature Reserve                                    |
| [89] |            | Wildlife Research and Management                |                                            | No  |                                             |              |                                                   |

|       |                  |                                                 |                                                        |     |                                                                               |                |                                                                                                     |
|-------|------------------|-------------------------------------------------|--------------------------------------------------------|-----|-------------------------------------------------------------------------------|----------------|-----------------------------------------------------------------------------------------------------|
| [90]  | French Polynesia | Wildlife Research and Management                | Moorea                                                 | No  |                                                                               |                |                                                                                                     |
| [91]  |                  | Wildlife Research and Management                |                                                        | No  |                                                                               |                |                                                                                                     |
| [92]  | Australia        | Wildlife Research and Management                | Little Llangothlin Lagoon , Lake Cargelligo            | Yes | Nature Reserve, Ramsar Site, Wetland of International Importance              | IV             |                                                                                                     |
| [93]  | USA              | Wildlife Research and Management                | Aleutian Islands, Monte Vista National Wildlife Refuge | Yes | National Wildlife Refuge                                                      | Ib, IV         | Nature Reserve, Ramsar Site, Wetland of International Importance                                    |
| [94]  | Canada           | Wildlife Research and Management                | Calgary                                                | No  |                                                                               |                | Wilderness, National Wildlife Refuge                                                                |
| [95]  | UK               | Wildlife Research and Management                | Inaccessible Island, Tristan da Cunha                  | Yes | Ramsar Site, Wetland of International Importance, Wildlife Reserve            |                |                                                                                                     |
| [96]  | Canada           | Wildlife Research and Management                | Saint-David-de-Falardeau                               | No  |                                                                               |                |                                                                                                     |
| [97]  |                  | Ecosystem monitoring                            |                                                        | No  |                                                                               |                |                                                                                                     |
| [98]  | Australia        | Wildlife Research and Management                | Exmouth Gulf                                           | No  |                                                                               |                |                                                                                                     |
| [99]  | USA              | Wildlife Research and Management                | Lower Snake River                                      | No  |                                                                               |                |                                                                                                     |
| [100] | Belgium          | Ecosystem monitoring                            | Ardennes                                               | No  |                                                                               |                |                                                                                                     |
| [101] | Italy            | Ecosystem monitoring                            | Tuscany                                                | No  |                                                                               |                |                                                                                                     |
| [102] | Peru             | Ecosystem monitoring                            | Los Amigos Biological Station                          | No  |                                                                               |                |                                                                                                     |
| [103] | Indonesia        | Ecosystem monitoring                            | Bukit Asam                                             | No  |                                                                               |                |                                                                                                     |
| [104] | Sweden           | Ecosystem monitoring                            | Lake Östräsket                                         | Yes | Special Protection Area (Birds Directive), Nature Reserve                     | IV             |                                                                                                     |
| [105] | China            | Ecosystem monitoring                            | Dinghushan (DHS) National Nature Reserve               | Yes | National Nature Reserve                                                       | Not Applicable | Special Protection Area (Birds Directive), Nature Reserve                                           |
| [106] | Malawi           | Ecosystem monitoring                            | Muyobe community forest reserve                        | Yes | Community Forest reserve                                                      |                | UNESCO-MAB Biosphere Reserve                                                                        |
| [107] | USA              | Wildlife Research and Management                | Aleutian Islands                                       | Yes | UNESCO-MAB Biosphere Reserve                                                  | Ib             |                                                                                                     |
| [108] | Antarctica       | Wildlife Research and Management                | Ardley Island                                          | Yes | Antarctic Specially Protected Area (ASPA), Important Bird Areas of Antarctica |                | Wilderness, UNESCO-MAB Biosphere Reserve                                                            |
| [109] | USA              | Ecosystem monitoring                            | Sevilleta National Wildlife Refuge                     | Yes | National Wildlife Refuge                                                      | IV             |                                                                                                     |
| [110] | Germany          | Ecosystem monitoring                            | Northern Black Forest                                  | Yes | NATURA 2000, forest reserve                                                   | V              | National Wildlife Refuge                                                                            |
| [111] | Canada           | Ecosystem monitoring                            | Tuktoyaktuk Coastal Plain Ecoregion                    | No  |                                                                               |                | Area of Critical Environmental Concern                                                              |
| [112] | Malaysia         | Wildlife Research and Management                | Kinabatangan River                                     | No  |                                                                               |                |                                                                                                     |
| [113] | Portugal         | Ecosystem monitoring                            | Esteveira                                              | No  |                                                                               |                |                                                                                                     |
| [114] |                  | Ecosystem monitoring                            |                                                        | No  |                                                                               |                |                                                                                                     |
| [115] | Australia        | Ecosystem monitoring                            |                                                        | No  |                                                                               |                |                                                                                                     |
| [116] | Ecuador          | Environmental management and emergency response | Galapagos National Park                                | Yes | National Park                                                                 |                |                                                                                                     |
| [117] | Canada           | Ecosystem monitoring                            | Lake Erie                                              | No  |                                                                               |                | National Park, Marine Reserve, World Heritage Site (natural or mixed), UNESCO-MAB Biosphere Reserve |
| [118] | Belgium          | Ecosystem monitoring                            | Berwinne valley                                        | No  |                                                                               |                |                                                                                                     |
| [119] | Congo            | Ecosystem monitoring                            | Garamba National Park                                  | Yes | National Park, World Heritage Site (natural or mixed)                         |                |                                                                                                     |
| [120] | Italy            | Ecosystem monitoring                            | Giglio Island                                          | Yes | Special Protection Area (Birds Directive)                                     |                | National Park, World Heritage Site (natural or mixed)                                               |

|       |                |                                                 |                                                                                                                                                                                         |     |                                                     |        |                                                                                              |
|-------|----------------|-------------------------------------------------|-----------------------------------------------------------------------------------------------------------------------------------------------------------------------------------------|-----|-----------------------------------------------------|--------|----------------------------------------------------------------------------------------------|
| [121] | Belgium        | Wildlife Research and Management                | Wallonia                                                                                                                                                                                | No  |                                                     |        | Special Protection Area (Birds Directive), Site of Community Importance (Habitats Directive) |
| [122] | USA            | Wildlife Research and Management                | Las Cruces                                                                                                                                                                              | No  |                                                     |        |                                                                                              |
| [123] | USA            | Environmental management and emergency response | Dan River in Eden, North Carolina                                                                                                                                                       | No  |                                                     |        |                                                                                              |
| [124] |                | Environmental management and emergency response |                                                                                                                                                                                         | No  |                                                     |        |                                                                                              |
| [125] | Korea          | Wildlife Research and Management                | Sobaeksan National Park                                                                                                                                                                 | Yes | National Park                                       | II     |                                                                                              |
| [126] | Antarctica     | Wildlife Research and Management                | Antarctic Specially Protected Area                                                                                                                                                      | Yes | Antarctic Specially Protected Area (ASPA)           | IV     | National Park                                                                                |
| [127] | Chile          | Wildlife Research and Management                | Gulf of Corcovado, Gulf of Ancud                                                                                                                                                        | No  |                                                     |        |                                                                                              |
| [128] | Romania        | Environmental management and emergency response | Somesul Mic catchment area                                                                                                                                                              | No  |                                                     |        |                                                                                              |
| [129] | Slovakia       | Environmental management and emergency response | Tatra National Park                                                                                                                                                                     | Yes | National Park                                       |        |                                                                                              |
| [130] | Czech Republic | Environmental management and emergency response | Masaryk Forest                                                                                                                                                                          | No  |                                                     |        | UNESCO-MAB Biosphere Reserve                                                                 |
| [131] | USA            | Wildlife Research and Management                | Upper Clark Fork and Bitterroot Rivers, Saskatchewan , Besnard Lake, Saskatchewan                                                                                                       | No  |                                                     |        |                                                                                              |
| [132] | Kenya          | Law enforcement                                 | Tsavo ecosystem: Tsavo East National Park, Tsavo West National Park, Chyulu Hills National Park, Ngai Ndethya National Reserve, Taita Hills Wildlife Sanctuary, Lumo Wildlife Sanctuary | Yes | National Park, National Reserve, Wildlife Sanctuary | II, VI |                                                                                              |
| [133] | China          | Ecosystem monitoring                            | Shule River Basin                                                                                                                                                                       | No  |                                                     |        | National Park, National Reserve, Community Wildlife Sanctuary                                |
| [134] | Portugal       |                                                 | Serra de Arga                                                                                                                                                                           | Yes | Site of Community Importance (Habitats Directive)   |        |                                                                                              |
| [135] | Nepal          | Ecosystem monitoring                            | Langtang Glacier                                                                                                                                                                        | Yes | National Park                                       | II     | Site of Community Importance (Habitats Directive)                                            |
| [136] | South Africa   | Ecosystem monitoring                            | Kameelzynkraal farm                                                                                                                                                                     | No  |                                                     |        | National Park                                                                                |
| [137] | USA            | Ecosystem monitoring                            | Whetstone Savanna                                                                                                                                                                       | Yes | Preserve                                            | V      |                                                                                              |
| [138] | Greece         | Ecosystem monitoring                            | Lesvos Island                                                                                                                                                                           | No  |                                                     |        | Private Conservation Land                                                                    |
| [139] | Australia      | Environmental management and emergency response |                                                                                                                                                                                         | No  |                                                     |        |                                                                                              |
| [140] |                | Environmental management and emergency response |                                                                                                                                                                                         | No  |                                                     |        |                                                                                              |
| [141] | Zanzibar       | Environmental management and emergency response | Unguja Island                                                                                                                                                                           | No  |                                                     |        |                                                                                              |
| [142] |                | Environmental management and emergency response |                                                                                                                                                                                         | No  |                                                     |        |                                                                                              |

|       |              |                                                 |                                                                                        |     |                                           |    |                                                                                                                                                                                              |
|-------|--------------|-------------------------------------------------|----------------------------------------------------------------------------------------|-----|-------------------------------------------|----|----------------------------------------------------------------------------------------------------------------------------------------------------------------------------------------------|
| [143] | Canada       | Ecosystem monitoring                            | Trent Severn Waterway                                                                  | No  |                                           |    |                                                                                                                                                                                              |
| [144] | Antarctica   | Ecosystem monitoring                            | Antarctic Specially Protected Area 135 , Robinson Ridge                                | Yes | Antarctic Specially Protected Area (ASPA) |    |                                                                                                                                                                                              |
| [145] | Canada       | Ecosystem monitoring                            | Trent University                                                                       | No  |                                           |    |                                                                                                                                                                                              |
| [146] | UK           | Environmental management and emergency response | Glasgow                                                                                | No  |                                           |    |                                                                                                                                                                                              |
| [147] | Canada       | Ecosystem monitoring                            | Ottawa                                                                                 | No  |                                           |    |                                                                                                                                                                                              |
| [148] | Ecuador      | Ecosystem monitoring                            | Cuyabeno National Park                                                                 | Yes | National Park                             |    |                                                                                                                                                                                              |
| [149] | Namibia      | Ecosystem monitoring                            |                                                                                        | No  |                                           |    | Fauna Production Reserve                                                                                                                                                                     |
| [150] | Korea        | Ecosystem monitoring                            | Sobaeksan National Park                                                                | Yes | National Park                             | II |                                                                                                                                                                                              |
| [151] | Spain        | Ecosystem monitoring                            | Picos de Europa National Park                                                          | Yes | National Park                             | II | National Park                                                                                                                                                                                |
| [152] | Norway       | Ecosystem monitoring                            |                                                                                        | No  |                                           |    | National Park, UNESCO-MAB Biosphere Reserve, Site of Community Importance (Habitats Directive), Special Protection Area (Birds Directive), Site of Community Importance (Habitats Directive) |
| [153] | Spain        | Environmental management and emergency response | Doñana Biological Reserve                                                              | Yes | Biological Reserve                        | V  |                                                                                                                                                                                              |
| [154] | USA          | Environmental management and emergency response | Sand Island                                                                            | No  |                                           |    |                                                                                                                                                                                              |
| [155] | Tanzania     | Wildlife Research and Management                | Burunge Wildlife Management Area                                                       | Yes | Wildlife Management Area                  |    |                                                                                                                                                                                              |
| [156] | Australia    | Wildlife Research and Management                | Sturt National Park, Strzelecki Reserve                                                | Yes | National Park                             | II | Wildlife management area                                                                                                                                                                     |
| [157] | UK           | Wildlife Research and Management                | Arroe Brook Farm Wirral                                                                | No  |                                           |    | National Park                                                                                                                                                                                |
| [158] | USA          | Environmental management and emergency response | Columbia Gorge National Scenic Area                                                    | Yes | National Scenic Area                      |    |                                                                                                                                                                                              |
| [159] | Chile        | Ecosystem monitoring                            | San Pedro River                                                                        | No  |                                           |    |                                                                                                                                                                                              |
| [160] | USA          | Ecosystem monitoring                            | Caribou-Targhee National Forest                                                        | Yes | National Forest                           |    |                                                                                                                                                                                              |
| [161] | Malaysia     | Wildlife Research and Management                | Lower Kinabatangan Wildlife Sanctuary (LKWS), Virgin Jungle Forest Reserve (VJFR) (B). | Yes | Wildlife Sanctuary, Forest Reserve        |    |                                                                                                                                                                                              |
| [162] | India        | Ecosystem monitoring                            | Mudimadagu village , Srinivaspur Taluk, Kola ; Indian Institute of Science             | No  |                                           |    | Ramsar Site, Wetland of International Importance                                                                                                                                             |
| [163] | Indonesia    | Wildlife Research and Management                | Gunung Leuser National Park                                                            | Yes | UNESCO Biosphere Reserve                  | II |                                                                                                                                                                                              |
| [164] | Australia    | Wildlife Research and Management                | Houtman Abrolhos Islands                                                               | Yes | Marine Reserve                            | IV | National Park                                                                                                                                                                                |
| [165] | USA          | Ecosystem monitoring                            | Lake Okeechobee                                                                        | Yes | Private Conservation Natural Region       | V  | Commonwealth Marine Reserve                                                                                                                                                                  |
| [166] | Canada       | Ecosystem monitoring                            | Boreal Forest Natural Region, Foothills Natural Region                                 | Yes |                                           |    | Private Conservation                                                                                                                                                                         |
| [167] | Canada       | Ecosystem monitoring                            | Koffler Scientific Reserve                                                             | Yes | Scientific Reserve                        |    |                                                                                                                                                                                              |
| [168] | UK           | Ecosystem monitoring                            | Meshaw                                                                                 | No  |                                           |    |                                                                                                                                                                                              |
| [169] | South Africa | Ecosystem monitoring                            |                                                                                        | No  | Alldays, South Africa                     |    | Site of Community Importance (Habitats Directive), Ramsar Site, Wetland of International Importance, Regional/Provincial Nature Reserve, Site of Community Importance (Habitats Directive)   |
| [170] | China        | Ecosystem monitoring                            |                                                                                        | No  |                                           |    |                                                                                                                                                                                              |

|       |                  |                                                 |                                                                                                                          |     |                                                                                    |     |                                                                                                               |
|-------|------------------|-------------------------------------------------|--------------------------------------------------------------------------------------------------------------------------|-----|------------------------------------------------------------------------------------|-----|---------------------------------------------------------------------------------------------------------------|
| [171] | Australia        | Ecosystem monitoring                            | Pickering Point, Shelly Beach, Point Lonsdale, Cheviot Beach, Ricketts Point, Halfmoon Bay, Mushroom Reef, West Flinders | Yes | Marine Protected areas                                                             | III |                                                                                                               |
| [172] | China            | Ecosystem monitoring                            | Dandou sea mangrove forest                                                                                               | No  |                                                                                    |     | Stewardship Area                                                                                              |
| [173] | Turkey           | Environmental management and emergency response | Zigana Mountain region                                                                                                   | No  |                                                                                    |     |                                                                                                               |
| [174] | Belgium          | Ecosystem monitoring                            | Hattlich                                                                                                                 | No  |                                                                                    |     |                                                                                                               |
| [175] | Canada           | Ecosystem monitoring                            | Koffler Scientific Reserve (KSR)                                                                                         | Yes | Scientific Reserve                                                                 |     |                                                                                                               |
| [176] | USA              | Ecosystem monitoring                            | Pahoa                                                                                                                    | No  |                                                                                    |     |                                                                                                               |
| [177] | Portugal         | Ecosystem monitoring                            | Esteveira                                                                                                                | No  |                                                                                    |     |                                                                                                               |
| [178] | USA              | Environmental management and emergency response | LaMaster pond                                                                                                            | No  |                                                                                    |     |                                                                                                               |
| [179] | Slovakia         | Ecosystem monitoring                            | Kremnica Mountains                                                                                                       | No  |                                                                                    |     |                                                                                                               |
| [180] | USA              | Ecosystem monitoring                            | Cache Creek                                                                                                              | Yes | Wildlife Area                                                                      | V   |                                                                                                               |
| [181] | Australia        | Wildlife Research and Management                | Port Willunga                                                                                                            | No  |                                                                                    |     | Wildlife Area                                                                                                 |
| [182] | China            | Ecosystem monitoring                            | Hainan Islan                                                                                                             | No  |                                                                                    |     |                                                                                                               |
| [183] | Guinea           | Environmental management and emergency response |                                                                                                                          | No  |                                                                                    |     |                                                                                                               |
| [184] | Germany          | Environmental management and emergency response |                                                                                                                          | No  |                                                                                    |     |                                                                                                               |
| [185] | Spain            | Wildlife Research and Management                | Estany d'Ivars i Vila-Sana                                                                                               | Yes | Special Areas of Conservation (SAC) , Special Protection Areas (SPAs), Natura 2000 | V   |                                                                                                               |
| [186] | Czech Republic   | Ecosystem monitoring                            |                                                                                                                          | No  |                                                                                    |     | Protection Plan, Site of Community Importance (Habitats Directive), Special Protection Area (Birds Directive) |
| [187] | Finland          | Ecosystem monitoring                            |                                                                                                                          | No  |                                                                                    |     |                                                                                                               |
| [188] | Czech Republic   | Ecosystem monitoring                            | Louny                                                                                                                    | No  |                                                                                    |     |                                                                                                               |
| [189] | Brazil           | Ecosystem monitoring                            | Caravelas                                                                                                                | No  |                                                                                    |     |                                                                                                               |
| [190] | Portugal         | Ecosystem monitoring                            | Viana de Castelo                                                                                                         | No  |                                                                                    |     |                                                                                                               |
| [191] | Australia        | Wildlife Research and Management                | North Stradbroke Island                                                                                                  | No  |                                                                                    |     |                                                                                                               |
| [192] |                  | Ecosystem monitoring                            |                                                                                                                          | No  |                                                                                    |     |                                                                                                               |
| [193] | Sweden           | Ecosystem monitoring                            | Lake Ostrträsket                                                                                                         | Yes | Nature Reserve, Special Protection Area (Birds Directive)                          |     |                                                                                                               |
| [194] | Germany          | Ecosystem monitoring                            | Tübingen Forest District                                                                                                 | Yes | Landscape Protection Area                                                          |     |                                                                                                               |
| [195] | USA              | Ecosystem monitoring                            | Cedar Creek                                                                                                              | No  |                                                                                    |     |                                                                                                               |
| [196] | French Polynesia | Ecosystem monitoring                            | Tiahura                                                                                                                  | Yes | Marine Protected areas                                                             |     |                                                                                                               |
| [197] | Czech Republic   | Ecosystem monitoring                            |                                                                                                                          | No  |                                                                                    |     |                                                                                                               |
| [198] | USA              | Ecosystem monitoring                            | Kachemak Bay                                                                                                             | Yes | Critical Habitat Area, State Park, National Estuarine Research Reserve, Easement   | V   |                                                                                                               |
| [199] | South Africa     | Ecosystem monitoring                            | Kameelzynkraal farm                                                                                                      | No  |                                                                                    |     | Critical Habitat Area, State Park, National Estuarine Research Reserve, Easement                              |
| [200] | Japan            | Environmental management                        | Kinu River                                                                                                               | No  |                                                                                    |     |                                                                                                               |

|       |              |                                                 |                                                                                                                                 |     |  |                                                  |    |                                                  |
|-------|--------------|-------------------------------------------------|---------------------------------------------------------------------------------------------------------------------------------|-----|--|--------------------------------------------------|----|--------------------------------------------------|
|       |              | and emergency response                          |                                                                                                                                 |     |  |                                                  |    |                                                  |
| [201] |              | Environmental management and emergency response |                                                                                                                                 | No  |  |                                                  |    |                                                  |
| [202] | Canada       | Wildlife Research and Management                | Hay Island, Saddle Island                                                                                                       | No  |  |                                                  |    |                                                  |
| [203] | USA          | Ecosystem monitoring                            | Rudd's Tank                                                                                                                     | No  |  |                                                  |    |                                                  |
| [204] | USA          | Wildlife Research and Management                | State Game Lands                                                                                                                | No  |  |                                                  |    |                                                  |
| [205] | Quebec       | Wildlife Research and Management                | Forêt Montmorency                                                                                                               | No  |  | ,                                                |    |                                                  |
| [206] | Greece       | Wildlife Research and Management                | Zakynthos Island, Laganas Bay                                                                                                   | No  |  |                                                  |    |                                                  |
| [207] | Switzerland  | Law enforcement                                 | Entlebuch UNESCO Biosphere Reserve                                                                                              | Yes |  | UNESCO Biosphere Reserve                         |    |                                                  |
| [208] | Antarctica   | Wildlife Research and Management                | Possession Island                                                                                                               | No  |  |                                                  |    |                                                  |
| [209] | USA          | Ecotourism                                      |                                                                                                                                 | No  |  |                                                  |    |                                                  |
| [210] | USA          | Ecotourism                                      |                                                                                                                                 | No  |  |                                                  |    |                                                  |
| [211] | Namibia      | Wildlife Research and Management                | Kuzikus wildlife reserve                                                                                                        | Yes |  | Wildlife Reserve                                 |    |                                                  |
| [212] | Mexico       | Wildlife Research and Management                | Islas del Golfo/Parque Nacional Zona Marina del Archipelago Espiritu Santo                                                      | Yes |  | National Park, Marine Protected Area             | Ia |                                                  |
| [213] | Canada       | Ecosystem monitoring                            | Youghall marsh, Pt. Carronmarsh                                                                                                 | No  |  |                                                  |    | National Park                                    |
| [214] | UK           | Wildlife Research and Management                |                                                                                                                                 | No  |  |                                                  |    |                                                  |
| [215] | Canada       | Ecosystem monitoring                            | Great Lakes/St Lawrence Lowlands Ecoregion                                                                                      | No  |  |                                                  |    |                                                  |
| [216] | Germany      | Environmental management and emergency response | Isle of Rügen, Baltic Sea                                                                                                       | No  |  |                                                  |    |                                                  |
| [217] | Australia    | Wildlife Research and Management                |                                                                                                                                 | No  |  |                                                  |    |                                                  |
| [218] | USA          | Wildlife Research and Management                | Race Point Channel                                                                                                              | Yes |  | National Park                                    |    |                                                  |
| [219] | Austria      | Ecosystem monitoring                            | Hohe Tauern National Park                                                                                                       | Yes |  | National Park                                    | II |                                                  |
| [220] | Korea        | Wildlife Research and Management                | Upo wetland, Changnyeong-gun, Kyungsangnam-do                                                                                   | No  |  |                                                  |    | National Park                                    |
| [221] | Canada       | Ecosystem monitoring                            |                                                                                                                                 | No  |  |                                                  |    |                                                  |
| [222] | UK           | Environmental management and emergency response | Ascension Island                                                                                                                | No  |  |                                                  |    |                                                  |
| [223] | China        | Ecosystem monitoring                            | Paektu Mountain, Gutian Mountain, Guangdong Province                                                                            | Yes |  | Ramsar Site, Wetland of International Importance |    |                                                  |
| [224] | Ecuador      | Ecosystem monitoring                            | Cotopaxi                                                                                                                        | No  |  |                                                  |    | Ramsar Site, Wetland of International Importance |
| [225] | Saudi Arabia | Environmental management and emergency response | northern Red Sea                                                                                                                | No  |  |                                                  |    |                                                  |
| [226] | Australia    | Wildlife Research and Management                | Bare Sand Island, Northern Territory (NT), Cape Domett in Western Australia (WA), and at multiple reefs across Camden Sound, WA | Yes |  | Marine Park                                      | VI |                                                  |
| [227] | Belize       | Wildlife Research and Management                | Turneffe Atoll Marine Reserve                                                                                                   | Yes |  | Marine Reserve                                   | IV | Marine Park                                      |
| [228] | Italy        | Ecosystem monitoring                            | Tuscan Archipelago National Park                                                                                                | Yes |  | National Park                                    |    | Nassau Grouper & Species Protection              |



|       |              |                                                 |                                       |     |                       |    |                                                                                                                                                                                                                                                                           |
|-------|--------------|-------------------------------------------------|---------------------------------------|-----|-----------------------|----|---------------------------------------------------------------------------------------------------------------------------------------------------------------------------------------------------------------------------------------------------------------------------|
| [229] | USA          | Wildlife Research and Management                | Newport, Port Orford                  | No  |                       |    |                                                                                                                                                                                                                                                                           |
| [230] | Malta        | Environmental management and emergency response | Maltese Islands                       | No  |                       |    |                                                                                                                                                                                                                                                                           |
| [231] |              | Law enforcement                                 |                                       | No  |                       |    |                                                                                                                                                                                                                                                                           |
| [232] | USA          | Environmental management and emergency response | Weaver Dunes Preserve                 | Yes | Dunes Preserve        |    |                                                                                                                                                                                                                                                                           |
| [233] | Tanzania     | Wildlife Research and Management                | Issa Valley                           | No  |                       |    |                                                                                                                                                                                                                                                                           |
| [234] | Namibia      | Wildlife Research and Management                | Kuzikus wildlife reserve              | Yes | Wildlife Reserve      |    |                                                                                                                                                                                                                                                                           |
| [235] | Italy        | Environmental management and emergency response | Ricasoli                              | No  |                       |    |                                                                                                                                                                                                                                                                           |
| [236] | Hungary      | Environmental management and emergency response | Lake Balaton                          | No  |                       |    |                                                                                                                                                                                                                                                                           |
| [237] | Netherlands  | Ecosystem monitoring                            | Breemwaard                            | No  |                       |    |                                                                                                                                                                                                                                                                           |
| [238] |              | Environmental management and emergency response |                                       | No  |                       |    |                                                                                                                                                                                                                                                                           |
| [239] | Spain        | Wildlife Research and Management                | Doñana National Park                  | Yes | National Park         | V  |                                                                                                                                                                                                                                                                           |
| [240] | USA          | Environmental management and emergency response | Lamaster Pond at Clemson              | No  |                       |    | National Park, Natural Park, Natura 2000, Special Protection Area (Birds Directive), Ramsar Site, Wetland of International Importance, Site of Community Importance (Habitats Directive), UNESCO-MAB Biosphere Reserve, Site of Community Importance (Habitats Directive) |
| [241] | Norway       | Wildlife Research and Management                | Rystraumen, Kaldjford                 | No  |                       |    |                                                                                                                                                                                                                                                                           |
| [242] | Australia    | Ecosystem monitoring                            | Pandora Reef                          | Yes | Marine Park           | Ia |                                                                                                                                                                                                                                                                           |
| [243] | Japan        | Ecosystem monitoring                            | Takayama                              | No  |                       |    | Marine Park                                                                                                                                                                                                                                                               |
| [244] | Antarctica   | Wildlife Research and Management                | Danger Islands                        | Yes | Strict Nature Reserve |    |                                                                                                                                                                                                                                                                           |
| [245] | Portugal     | Ecosystem monitoring                            | Figueira da Foz                       | No  |                       |    | Strict Nature Reserve                                                                                                                                                                                                                                                     |
| [246] | Malaysia     | Ecosystem monitoring                            | Matang Mangrove Forest Reserve (MMFR) | Yes | Forest Reserve (MMFR) |    |                                                                                                                                                                                                                                                                           |
| [247] | USA          | Environmental management and emergency response | Lamaster Pond at Clemson              | No  |                       |    |                                                                                                                                                                                                                                                                           |
| [248] | China        | Wildlife Research and Management                | Sanjiangyuan National Park            | Yes | National Park         |    |                                                                                                                                                                                                                                                                           |
| [249] | USA          | Wildlife Research and Management                |                                       | No  |                       |    |                                                                                                                                                                                                                                                                           |
| [250] | Nepal        | Wildlife Research and Management                | Bardia National Park                  | Yes | National Park         | II |                                                                                                                                                                                                                                                                           |
| [251] |              | Law enforcement                                 |                                       | No  |                       |    | National Park                                                                                                                                                                                                                                                             |
| [252] | South Korea  | Wildlife Research and Management                | Chungcheongnam-do                     | No  |                       |    |                                                                                                                                                                                                                                                                           |
| [253] | Germany      | Ecosystem monitoring                            | Schleswig-Holstein                    | No  |                       |    |                                                                                                                                                                                                                                                                           |
| [254] | South Africa | Wildlife Research and Management                | Lake Nyamithi, Ndumo game reserve     | Yes | Game reserve          |    |                                                                                                                                                                                                                                                                           |
| [255] | Indonesia    | Ecosystem monitoring                            | Sikundur                              | No  |                       |    | Ramsar Site, Wetland of International Importance                                                                                                                                                                                                                          |

|       |                  |                                                 |        |    |
|-------|------------------|-------------------------------------------------|--------|----|
| [256] | French Polynesia | Wildlife Research and Management                | Moorea | No |
| [257] | Hungary          | Environmental management and emergency response |        | No |

## References

1. Abd-Elrahman, A.; Pearlstone, L.; Percival, F. Development of Pattern Recognition Algorithm for Automatic Bird detection from unmanned aerial vehicle imagery. *Surv. L. Inf. Sci.* **2005**, *65*, 37.
2. Schmale, D. G.; Dingus, B. R.; Reinholtz, C. Development and application of an autonomous unmanned aerial vehicle for precise aerobiological sampling above agricultural fields. *J. F. Robot.* **2008**, *25*, 133–147, doi:10.1002/rob.20232.
3. Koski, W. R.; Allen, T.; Ireland, D.; Buck, G.; Smith, P. R.; Macreender, A. M.; Halick, M. A.; Rushing, C.; Sliwa, D. J.; McDonald, T. L. Evaluation of an unmanned airborne system for monitoring marine mammals. *Aquat. Mamm.* **2009**, *35*, 347–357, doi:10.1578/AM.35.3.2009.347.
4. Acevedo-Whitehouse, K.; Rocha-Gosselin, A.; Gendron, D. A novel non-invasive tool for disease surveillance of free-ranging whales and its relevance to conservation programs. *Anim. Conserv.* **2010**, *13*, 217–225, doi:10.1111/j.1469-1795.2009.00326.x.
5. Watts, A. C.; Perry, J. H.; Smith, S. E.; Burgess, M. A.; Wilkinson, B. E.; Szantoi, Z.; Ifju, P. G.; Percival, H. F. Small Unmanned Aircraft Systems for Low-Altitude Aerial Surveys. *J. Wildl. Manage.* **2010**, *74*, 1614–1619, doi:10.2193/2009-425.
6. Israel, M. A Uav-Based Roe Deer Fawn Detection System. *ISPRS - Int. Arch. Photogramm. Remote Sens. Spot. Inf. Sci.* **2012**, XXXVIII-1/, 51–55, doi:10.5194/isprsarchives-XXXVIII-1-C22-51-2011.
7. de Dios, J. R. M.; Merino, L.; Caballero, F.; Ollero, A. Automatic forest-fire measuring using ground stations and unmanned aerial systems. *Sensors* **2011**, *11*, 6328–6353, doi:10.3390/s110606328.
8. Rau, J. Y.; Jhan, J. P.; Lo, C. F.; Lin, Y. S. Landslide Mapping Using Imagery Acquired By a Fixed-Wing Uav. *ISPRS - Int. Arch. Photogramm. Remote Sens. Spot. Inf. Sci.* **2012**, XXXVIII-1/, 195–200, doi:10.5194/isprsarchives-XXXVIII-1-C22-195-2011.
9. Laliberte, A. S.; Goforth, M. A.; Steele, C. M.; Rango, A. Multispectral remote sensing from unmanned aircraft: Image processing workflows and applications for rangeland environments. *Remote Sens.* **2011**, *3*, 2529–2551, doi:10.3390/rs3112529.
10. Chabot, D.; Bird, D. M. Evaluation of an off-the-shelf Unmanned Aircraft System for Surveying Flocks of Geese. *Waterbirds* **2012**, *35*, 170–174, doi:10.1675/063.035.0119.
11. Sardà-Palomera, F.; Bota, G.; Viñolo, C.; Pallarés, O.; Sazatornil, V.; Brotons, L.; Gomáriz, S.; Sardà, F. Fine-scale bird monitoring from light unmanned aircraft systems. *Ibis (Lond. 1859)*. **2012**, *154*, 177–183, doi:10.1111/j.1474-919X.2011.01177.x.
12. Rodríguez, A.; Negro, J. J.; Mulero, M.; Rodríguez, C.; Hernández-Pliego, J.; Bustamante, J. The Eye in the Sky: Combined Use of Unmanned Aerial Systems and GPS Data Loggers for Ecological Research and Conservation of Small Birds. *PLoS One* **2012**, *7*, doi:10.1371/journal.pone.0050336.
13. Martin, J.; Edwards, H. H.; Burgess, M. A.; Percival, H. F.; Fagan, D. E.; Gardner, B. E.; Ortega-Ortiz, J. G.; Ifju, P. G.; Evers, B. S.; Rambo, T. J. Estimating distribution of hidden objects with drones: From tennis balls to manatees. *PLoS One* **2012**, *7*, 1–8, doi:10.1371/journal.pone.0038882.
14. Getzin, S.; Wiegand, K.; Schöning, I. Assessing biodiversity in forests using very high-resolution images and unmanned aerial vehicles. *Methods Ecol. Evol.* **2012**, *3*, 397–404, doi:10.1111/j.2041-210X.2011.00158.x.
15. Koh, L. P.; Wich, S. A. Dawn of drone ecology: low-cost autonomous aerial vehicles for conservation. *Trop. Conserv. Sci.* **2012**, *5*, 121–132, doi:WOS:000310846600002.
16. D'Oleire-Oltmanns, S.; Marzloff, I.; Peter, K. D.; Ries, J. B. Unmanned aerial vehicle (UAV) for monitoring soil erosion in Morocco. *Remote Sens.* **2012**, *4*, 3390–3416, doi:10.3390/rs4113390.
17. Mulero-Pázmány, M.; Negro, J. J.; Ferrer, M. A low cost way for assessing bird risk hazards in power lines: Fixed-wing small unmanned aircraft systems. *J. Unmanned Veh. Syst.* **2014**, *02*, 5–15, doi:10.1139/juvs-2013-0012.
18. Hodgson, A.; Kelly, N.; Peel, D. Unmanned aerial vehicles (UAVs) for surveying Marine Fauna: A dugong case study. *PLoS One* **2013**, *8*, 1–15, doi:10.1371/journal.pone.0079556.
19. Vermeulen, C.; Lejeune, P.; Lisein, J.; Sawadogo, P.; Bouché, P. Unmanned Aerial Survey of Elephants. *PLoS One* **2013**, *8*, doi:10.1371/journal.pone.0054700.
20. Lisein, J.; Pierrot-Deseilligny, M.; Bonnet, S.; Lejeune, P. A photogrammetric workflow for the creation of a forest canopy height model from small unmanned aerial system imagery. *Forests* **2013**, *4*, 922–944, doi:10.3390/f4040922.
21. Dufour, S.; Bernez, I.; Betbeder, J.; Corgne, S.; Hubert-Moy, L.; Nabucet, J.; Rapinel, S.; Sawtschuk, J.; Trollé, C. Monitoring restored riparian vegetation: how can recent developments in remote sensing sciences help? *Knowl. Manag. Aquat. Ecosyst.* **2013**, *10*, doi:10.1051/kmae/2013068.
22. Chabot, D.; Bird, D. M. Small unmanned aircraft: precise and convenient new tools for surveying wetlands. **2013**, *24*, 15–24.
23. Husson, E.; Hagner, O.; Ecke, F. Unmanned aircraft systems help to map aquatic vegetation. *Appl. Veg. Sci.* **2013**, *17*, 567–577, doi:10.1111/avsc.12072.
24. Knoth, C.; Klein, B.; Prinz, T.; Kleinebecker, T. Unmanned aerial vehicles as innovative remote sensing platforms for high-resolution infrared imagery to support restoration monitoring in cut-over bogs. *Appl. Veg. Sci.* **2013**, doi:10.1111/avsc.12024.
25. Mulero-Pázmány, M.; Stolper, R.; Van Essen, L. D.; Negro, J. J.; Sassen, T. Remotely piloted aircraft systems as a rhinoceros anti-poaching tool in Africa. *PLoS One* **2014**, *9*, 1–10, doi:10.1371/journal.pone.0083873.
26. Chabot, D.; Carignan, V.; Bird, D. M. Measuring habitat quality for least bitterns in a created wetland with use of a small unmanned aircraft. *Wetlands* **2014**, *34*, 527–533, doi:10.1007/s13157-014-0518-1.

27. Barasona, J. A.; Mulero-Pázmány, M.; Acevedo, P.; Negro, J. J.; Torres, M. J.; Gortázar, C.; Vicente, J. Unmanned aircraft systems for studying spatial abundance of ungulates: Relevance to spatial epidemiology. *PLoS One* **2014**, *9*, 1–17, doi:10.1371/journal.pone.0115608.
28. Inoue, T.; Nagai, S.; Yamashita, S.; Fadaei, H.; Ishii, R.; Okabe, K.; Taki, H.; Honda, Y.; Kajiwara, K.; Suzuki, R. Unmanned aerial survey of fallen trees in a deciduous broadleaved forest in eastern Japan. *PLoS One* **2014**, *9*, doi:10.1371/journal.pone.0109881.
29. Wing, M. G.; Burnett, J.; Johnson, S.; Akay, A. E.; Sessions, J. A Low-cost Unmanned Aerial System for Remote Sensing of Forested Landscapes. *Int. J. Remote Sens. Appl.* **2014**, *4*, doi:10.14355/ijrsa.2014.0403.01.
30. Getzin, S.; Nuske, R. S.; Wiegand, K. Using unmanned aerial vehicles (UAV) to quantify spatial gap patterns in forests. *Remote Sens.* **2014**, *6*, 6988–7004, doi:10.3390/rs6086988.
31. Flynn, K. F.; Chapra, S. C. Remote sensing of submerged aquatic vegetation in a shallow non-turbid river using an unmanned aerial vehicle. *Remote Sens.* **2014**, *6*, 12815–12836, doi:10.3390/rs61212815.
32. Kaneko, K.; Nohara, S.; Kaneko, K.; Nohara, S. Review of Effective Vegetation Mapping Using the UAV (Unmanned Aerial Vehicle) Method. *J. Geogr. Inf. Syst.* **2014**, *6*, 733–742, doi:10.4236/jgis.2014.66060.
33. Christiansen, P.; Steen, K. A. rild; Jørgensen, R. N. yholm; Karstoft, H. Automated detection and recognition of wildlife using thermal cameras. *Sensors (Basel)*. **2014**, *14*, 13778–13793, doi:10.3390/s140813778.
34. Husson, E.; Lindgren, F.; Ecke, F. Assessing Biomass and Metal Contents in Riparian Vegetation Along a Pollution Gradient Using an Unmanned Aircraft System. *Water, Air, Soil Pollut.* **2014**, doi:10.1007/s11270-014-1957-2.
35. Fornace, K. M.; Drakeley, C. J.; William, T.; Espino, F.; Cox, J. Mapping infectious disease landscapes: unmanned aerial vehicles and epidemiology. *Trends Parasitol.* **2014**, 1–6, doi:10.1016/j.pt.2014.09.001.
36. Casella, E.; Rovere, A.; Pedroncini, A.; Mucerino, L.; Casella, M.; Cusati, L. A.; Vacchi, M.; Ferrari, M.; Firpo, M. Study of wave runup using numerical models and low-altitude aerial photogrammetry: A tool for coastal management. *Estuar. Coast. Shelf Sci.* **2014**, *149*, 160–167, doi:10.1016/j.ecss.2014.08.012.
37. Vivoni, E. R.; Rango, A.; Anderson, C.; Plerini, N. A.; Schreiner-McGraw, A. P.; Saripalli, S.; Laliberte, A. S. Ecohydrology with unmanned aerial vehicles. *Ecosphere* **2014**, *5*, 1–14.
38. Burns, P.; Nolin, A. Using atmospherically-corrected Landsat imagery to measure glacier area change in the Cordillera Blanca, Peru from 1987 to 2010. *Remote Sens. Environ.* **2014**, doi:10.1016/j.rse.2013.08.026.
39. Nakano, T.; Kamiya, I.; Tobita, M.; Iwahashi, J.; Nakajima, H. Landform monitoring in active volcano by UAV and SFM-MVS technique. In *International Archives of the Photogrammetry, Remote Sensing and Spatial Information Sciences - ISPRS Archives*; 2014.
40. Weissensteiner, M. H.; Poelstra, J. W.; Wolf, J. B. W. Low-budget ready-to-fly unmanned aerial vehicles: An effective tool for evaluating the nesting status of canopy-breeding bird species. *J. Avian Biol.* **2015**, *46*, 425–430, doi:10.1111/jav.00619.
41. Ratcliffe, N.; Guihen, D.; Robst, J.; Crofts, S.; Stanworth, A.; Enderlein, P. A protocol for the aerial survey of penguin colonies using UAVs <sup>1</sup>. *J. Unmanned Veh. Syst.* **2015**, *3*, 95–101, doi:10.1139/juvs-2015-0006.
42. Ivošević, B.; Han, Y. G.; Cho, Y.; Kwon, O. The use of conservation drones in ecology and wildlife research. *J. Ecol. Environ.* **2015**, *38*, 113–118, doi:10.5141/ecoenv.2015.012.
43. Olivares-Mendez, M.; Fu, C.; Ludvig, P.; Bisschandé, T.; Kannan, S.; Zurad, M.; Annaian, A.; Voos, H.; Campoy, P. Towards an Autonomous Vision-Based Unmanned Aerial System against Wildlife Poachers. *Sensors* **2015**, *15*, 31362–31391, doi:10.3390/s151229861.
44. Mulero-Pázmány, M.; Barasona, J. Á.; Acevedo, P.; Vicente, J.; Negro, J. J. Unmanned Aircraft Systems complement biologging in spatial ecology studies. *Ecol. Evol.* **2015**, *5*, 4808–4818, doi:10.1002/ece3.1744.
45. Puttock, A. K.; Cunliffe, A. M.; Anderson, K.; Brazier, R. E. Aerial photography collected with a multirotor drone reveals impact of Eurasian beaver reintroduction on ecosystem structure 1. *J. Unmanned Veh. Syst.* **2015**, *3*, 123–130, doi:10.1139/juvs-2015-0005.
46. Dulava, S.; Bean, W. T.; Richmond, O. M. W. ENVIRONMENTAL REVIEWS AND CASE STUDIES: Applications of Unmanned Aircraft Systems (UAS) for Waterbird Surveys. *Environ. Pract.* **2015**, *17*, 201–210, doi:10.1017/S1466046615000186.
47. van Andel, A. C.; Wich, S. A.; Boesch, C.; Koh, L. P.; Robbins, M. M.; Kelly, J.; Kuehl, H. S. Locating chimpanzee nests and identifying fruiting trees with an unmanned aerial vehicle. *Am. J. Primatol.* **2015**, *77*, 1122–1134, doi:10.1002/ajp.22446.
48. Drever, M. C.; Chabot, D.; O'Hara, P. D.; Thomas, J. D.; Breault, A.; Millikin, R. L. Evaluation of an unmanned rotorcraft to monitor wintering waterbirds and coastal habitats in British Columbia, Canada. *J. Unmanned Veh. Syst.* **2015**, *3*, 256–267, doi:10.1139/juvs-2015-0019.
49. Chabot, D.; Craik, S. R.; Bird, D. M. Population census of a large common tern colony with a small unmanned aircraft. *PLoS One* **2015**, *10*, doi:10.1371/journal.pone.0122588.
50. Linchant, J.; Lhoest, S.; Quevauvillers, S.; Semeki, J.; Lejeune, P.; Vermeulen, C. WIMUAS: Developing a tool to review wildlife data from various UAS flight plans. In *International Archives of the Photogrammetry, Remote Sensing and Spatial Information Sciences - ISPRS Archives*; 2015; Vol. 40, pp. 379–384.
51. Duriez, O.; Boguszewski, G.; Vas, E.; Gre, D. Approaching birds with drones: first experiments and ethical guidelines <sup>1</sup>. **2015**, 2015–2018.
52. Koski, W. R.; Gamage, G.; Davis, A. R.; Mathews, T.; LeBlanc, B.; Ferguson, S. H. Evaluation of UAS for photographic re-identification of bowhead whales, *Balaena mysticetus*. *J. Unmanned Veh. Syst.* **2015**, *3*, 22–29, doi:10.1139/juvs-2014-0014.
53. Junda, J.; Greene, E.; Bird, D. M. Proper flight technique for using a small rotary-winged drone aircraft to safely, quickly, and accurately survey raptor nests. *J. Unmanned Veh. Syst.* **2015**, *3*, 222–236, doi:10.1139/juvs-2015-0003.
54. Lhoest, S.; Linchant, J.; Quevauvillers, S.; Vermeulen, C.; Lejeune, P. How many hippos (Homhip): Algorithm for automatic counts of animals with infra-red thermal imagery from UAV. *Int. Arch. Photogramm. Remote Sens. Spat. Inf. Sci. - ISPRS Arch.* **2015**, *40*, 355–362, doi:10.5194/isprsarchives-XL-3-W3-355-2015.
55. Liu, C. C.; Chen, Y. H.; Wen, H. L. Supporting the annual international black-faced spoonbill census with a low-cost unmanned aerial vehicle. *Ecol. Inform.* **2015**, *30*, 170–178, doi:10.1016/j.ecoinf.2015.10.008.
56. Chrétien, L.-P.; Théau, J.; Ménard, P. Wildlife Multispecies Remote Sensing Using Visible and Thermal Infrared Imagery Acquired From an Unmanned Aerial Vehicle (Uav). *ISPRS - Int. Arch. Photogramm. Remote Sens. Spat. Inf. Sci.* **2015**, *XL-1/W4*, 241–248, doi:10.5194/isprsarchives-XL-1-W4-241-2015.
57. Nevalainen, O.; Honkavaara, E.; Tuominen, S.; Viljanen, N.; Hakala, T.; Yu, X.; Hyypä, J.; Saari, H.; Pölonen, I.; Imai, N. N.; Tommaselli, A. M. G. Individual tree detection and classification with UAV-Based photogrammetric point clouds and hyperspectral imaging. *Remote Sens.* **2017**, *9*, doi:10.3390/rs9030185.

58. Puliti, S.; Olerka, H.; Gobakken, T.; Næsset, E. Inventory of Small Forest Areas Using an Unmanned Aerial System. *Remote Sens.* **2015**, *7*, 9632–9654, doi:10.3390/rs70809632.
59. Dandois, J. P.; Olano, M.; Ellis, E. C. Optimal altitude, overlap, and weather conditions for computer vision uav estimates of forest structure. *Remote Sens.* **2015**, *7*, 13895–13920, doi:10.3390/rs71013895.
60. Näsi, R.; Honkavaara, E.; Lyytikäinen-Saarenmaa, P.; Blomqvist, M.; Litkey, P.; Hakala, T.; Viljanen, N.; Kantola, T.; Tanhuanpää, T.; Holopainen, M. Using UAV-based photogrammetry and hyperspectral imaging for mapping bark beetle damage at tree-level. *Remote Sens.* **2015**, *7*, 15467–15493, doi:10.3390/rs71115467.
61. Zahawi, R. A.; Dandois, J. P.; Holl, K. D.; Nadwodny, D.; Reid, J. L.; Ellis, E. C. Using lightweight unmanned aerial vehicles to monitor tropical forest recovery. *Biol. Conserv.* **2015**, *186*, 287–295, doi:10.1016/j.biocon.2015.03.031.
62. Brooke, S.; Graham, D.; Jacobs, T.; Littnan, C.; Manuel, M.; O’Conner, R. Testing marine conservation applications of unmanned aerial systems (UAS) in a remote marine protected area. *J. Unmanned Veh. Syst.* **2015**, *3*, 237–251, doi:10.1139/juvs-2015-0011.
63. Su, T.-C.; Chou, H.-T. Application of Multispectral Sensors Carried on Unmanned Aerial Vehicle (UAV) to Trophic State Mapping of Small Reservoirs: A Case Study of Tain-Pu Reservoir in Kinmen, Taiwan. *Remote Sens.* **2015**, *7*, 10078, doi:10.3390/rs70810078.
64. Zweig, C. L.; Burgess, M. A.; Percival, H. F.; Kitchens, W. M. Use of Unmanned Aircraft Systems to Delineate Fine-Scale Wetland Vegetation Communities. *Wetlands* **2015**, *35*, 303–309, doi:10.1007/s13157-014-0612-4.
65. Dittmer, M. A.; Vincent, J. B.; Werden, L. K.; Tanner, J. C.; Laske, T. G.; Iaizzo, P. A.; Garshelis, D. L.; Fieberg, J. R. Bears Show a Physiological but Limited Behavioral Response to Unmanned Aerial Vehicles. *Curr. Biol.* **2015**, *25*, 2278–2283, doi:10.1016/j.cub.2015.07.024.
66. Lisein, J.; Michez, A.; Claessens, H.; Lejeune, P. Discrimination of deciduous tree species from time series of unmanned aerial system imagery. *PLoS One* **2015**, *10*, doi:10.1371/journal.pone.0141006.
67. Marcaccio, J. V.; Markle, C. E.; Chow-Fraser, P. Unmanned aerial vehicles produce high-resolution, seasonally-relevant imagery for classifying wetland vegetation. In *International Archives of the Photogrammetry, Remote Sensing and Spatial Information Sciences - ISPRS Archives*; 2015; Vol. 40, pp. 249–256.
68. Goebel, M. E.; Perryman, W. L.; Hinke, J. T.; Krause, D. J.; Hann, N. A.; Gardner, S.; LeRo, D. J. A small unmanned aerial system for estimating abundance and size of Antarctic predators. *Polar Biol.* **2015**, *38*, 619–630, doi:10.1007/s00300-014-1625-4.
69. Durban, J. W.; Fearnbach, H.; Perryman, W. L.; Leroi, D. J. Photogrammetry of killer whales using a small hexacopter launched at sea. *J. Unmanned Veh. Syst.* **2015**, *3*, 1–5, doi:dx.doi.org/10.1139/juvs-2015-0020.
70. Ore, J. P.; Elbaum, S.; Burgin, A.; Detweiler, C. Autonomous aerial water sampling. *J. F. Robot.* **2015**, *32*, 1095–1113, doi:10.1002/rob.21591.
71. Evans, L. J.; Jones, T. H.; Pang, K.; Evans, M. N.; Salmin, S.; Goossens, B. Use of drone technology as a tool for behavioral research: A case study of crocodilian nesting. *Herpetol. Conserv. Biol.* **2015**, *10*, 90–98, doi:10.3233/978-1-61499-432-9-895.
72. Tamás Fráter; Tatjana Juzsakova; János Lauer; László Dióssy; Ákos Rédey Unmanned Aerial Vehicles in Environmental Monitoring—An Efficient Way for Remote Sensing. *J. Environ. Sci. Eng. A* **2015**, *4*, 85–91, doi:10.17265/2162-5298/2015.02.004.
73. Tamminga, A. D.; Eaton, B. C.; Hugenholtz, C. H. UAS-based remote sensing of fluvial change following an extreme flood event. *Earth Surf. Process. Landforms* **2015**, *40*, 1464–1476, doi:10.1002/esp.3728.
74. Lobermeier, S.; Moldenhauer, M.; Peter, C.; Slominski, L.; Tedesco, R.; Meer, M.; Dwyer, J.; Harness, R.; Stewart, A. Mitigating avian collision with power lines: a proof of concept for installation of line markers via unmanned aerial vehicle. *J. Unmanned Veh. Syst.* **2015**, *3*, 252–258, doi:10.1139/juvs-2015-0009.
75. Capolupo, A.; Pindozi, S.; Okello, C.; Fiorentino, N.; Boccia, L. Photogrammetry for environmental monitoring: The use of drones and hydrological models for detection of soil contaminated by copper. *Sci. Total Environ.* **2015**, *514*, 298–306, doi:10.1016/j.scitotenv.2015.01.109.
76. Gonçalves, J. A.; Henriques, R. UAV photogrammetry for topographic monitoring of coastal areas. *ISPRS J. Photogramm. Remote Sens.* **2015**, doi:10.1016/j.isprsjprs.2015.02.009.
77. Themistocleous, K.; Ioannides, M.; Agapiou, A.; Hadjimitsis, D. G. The methodology of documenting cultural heritage sites using photogrammetry, UAV, and 3D printing techniques: the case study of Asinou Church in Cyprus. **2015**, 953510, doi:10.1117/12.2195626.
78. Liu, C.-C.; Chen, P.-L.; Matsuo, T.; Chen, C.-Y. Rapidly responding to landslides and debris flow events using a low-cost unmanned aerial vehicle. *J. Appl. Remote Sens.* **2015**, doi:10.1117/1.JRS.9.096016.
79. Birdsong, T. W.; Bean, M.; Grabowski, T. B.; Hardy, T. B.; Heard, T.; Holdstock, D.; Kollaus, K.; Magnelia, S.; Tolman, K. Application and utility of a low-cost unmanned aerial system to manage and conserve aquatic resources in four Texas rivers. *J. Southeast. Assoc. Fish Wildl. Agencies* **2015**, *2*, 80–85.
80. Capolupo, A.; Koistira, L.; Berendonk, C.; Boccia, L.; Suomalainen, J. Estimating Plant Traits of Grasslands from UAV-Acquired Hyperspectral Images: A Comparison of Statistical Approaches. *ISPRS Int. J. Geo-Information* **2015**, doi:10.3390/ijgi4042792.
81. Johnston, M.; McCaldin, G.; Rieker, A. Assessing the availability of aerially-delivered baits to feral cats through rainforest canopy using unmanned aircraft. **2016**, doi:10.3217/978-3-85125-603-1-21.
82. Elsey, R. M.; Trosclair III, P. L. The Use of an Unmanned Aerial Vehicle to Locate Alligator Nests. *Southeast. Nat.* **2016**, *15*, 76–82, doi:10.1656/058.015.0106.
83. Tavakoli, S.; Heaton, A. Wildlife Tracking on the Wing Using Unmanned Air Systems. *AIAA Infotech @ Aerospace, AIAA SciTech*, **2016**, 1–7, doi:http://dx.doi.org/10.2514/6.2016-0919.
84. Wich, S.; Dellatore, D.; Houghton, M.; Ardi, R.; Koh, L. P. A preliminary assessment of using conservation drones for Sumatran orangutan (*Pongo abelii*) distribution and density. *J. Unmanned Veh. Syst.* **2016**, *4*, 45–52, doi:10.1139/juvs-2015-0015.
85. Habel, J. C.; Teucher, M.; Ulrich, W.; Bauer, M.; Rödder, D. Drones for butterfly conservation: larval habitat assessment with an unmanned aerial vehicle. *Landsc. Ecol.* **2016**, *31*, 2385–2395, doi:10.1007/s10980-016-0409-3.
86. Patterson, C.; Koski, W.; Pace, P.; McLuckie, B.; Bird, D. M. Evaluation of an unmanned aircraft system for detecting surrogate caribou targets in Labrador. *J. Unmanned Veh. Syst.* **2016**, *4*, 53–69, doi:10.1139/juvs-2015-0014.
87. Hodgson, J. C.; Baylis, S. M.; Mott, R.; Herrod, A.; Clarke, R. H. Precision wildlife monitoring using unmanned aerial vehicles. *Sci. Rep.* **2016**, *6*, 22574, doi:10.1038/srep22574.
88. Gonzalez, L. F.; Montes, G. A.; Puig, E.; Johnson, S.; Mengersen, K.; Gaston, K. J. Unmanned aerial vehicles (UAVs) and artificial intelligence revolutionizing wildlife monitoring and conservation. *Sensors (Switzerland)* **2016**, *16*, doi:10.3390/s16010097.
89. Smith, C. E.; Sykora-Bodie, S. T.; Bloodworth, B.; Pack, S. M.; Spradlin, T. R.; LeBoeuf, N. R. Assessment of known impacts of unmanned aerial systems (UAS) on

- marine mammals: data gaps and recommendations for researchers in the United States. *J. Unmanned Veh. Syst.* **2016**, *4*, 31–44, doi:10.1139/juvs-2015-0017.
90. Kiszka, J. J.; Mourier, J.; Gastrich, K.; Heithaus, M. R. Using unmanned aerial vehicles (UAVs) to investigate shark and ray densities in a shallow coral lagoon. *Mar. Ecol. Prog. Ser.* **2016**, *560*, 237–242, doi:10.3354/meps11945.
  91. Harvey, R. J.; Roskilly, K.; Buse, C.; Evans, H. K.; Hubel, T. Y.; Wilson, A. M. Determining position, velocity and acceleration of free-ranging animals with a low-cost unmanned aerial system. *J. Exp. Biol.* **2016**, *219*, 2687–2692, doi:10.1242/jeb.139022.
  92. McEvoy, J. F.; Hall, G. P.; McDonald, P. G. Evaluation of unmanned aerial vehicle shape, flight path and camera type for waterfowl surveys: disturbance effects and species recognition. *PeerJ* **2016**, *4*, doi:10.7717/peerj.1831.
  93. Christie, K. S.; Gilbert, S. L.; Brown, C. L.; Hatfield, M.; Hanson, L. Unmanned aircraft systems in wildlife research: Current and future applications of a transformative technology. *Front. Ecol. Environ.* **2016**, *14*, 241–251, doi:10.1002/fee.1281.
  94. Scobie, C. A.; Hugenholtz, C. H. Wildlife monitoring with unmanned aerial vehicles: Quantifying distance to auditory detection. *Wildl. Soc. Bull.* **2016**, *40*, 781–785, doi:10.1002/wsb.700.
  95. McClelland, G. T. W.; Bond, A. L.; Sardana, A.; Glass, T. Rapid population estimate of a surface-nesting seabird on a remote island using a low-cost unmanned aerial vehicle. *Mar. Ornithol.* **2016**, *44*, 215–220.
  96. Chrétien, L.-P.; Théau, J.; Ménard, P. Visible and thermal infrared remote sensing for the detection of white-tailed deer using an unmanned aerial system. *Wildl. Soc. Bull.* **2016**, *40*, 181–191, doi:10.1002/wsb.629.
  97. Berra, E. F.; Gaulton, R.; Barr, S. Use of a digital camera onboard a UAV to monitor spring phenology at individual tree level. In *International Geoscience and Remote Sensing Symposium (IGARSS)*; 2016; Vol. 2016–Novem, pp. 3496–3499.
  98. Christiansen, F.; Rojano-Doñate, L.; Madsen, P. T.; Bejder, L. Noise Levels of Multi-Rotor Unmanned Aerial Vehicles with Implications for Potential Underwater Impacts on Marine Mammals. *Front. Mar. Sci.* **2016**, *3*, doi:10.3389/fmars.2016.00277.
  99. Groves, P. A.; Alcorn, B.; Wiest, M. M.; Maselko, J. M.; Connor, W. P.; Company, I. P.; Marine, N.; Service, F.; Fisheries, A.; Laboratories, A. B.; Service, W.; Fish, I.; Office, W. C. Testing unmanned aircraft systems for salmon spawning surveys. **2016**, 187–204, doi:10.1139/facets-2016-0019.
  100. Michez, A.; Piégay, H.; Lisein, J.; Claessens, H.; Lejeune, P. Classification of riparian forest species and health condition using multi-temporal and hyperspatial imagery from unmanned aerial system. *Environ. Monit. Assess.* **2016**, *188*, 1–19, doi:10.1007/s10661-015-4996-2.
  101. Chianucci, F.; Disperati, L.; Guzzi, D.; Bianchini, D.; Nardino, V.; Lastri, C.; Rindinella, A.; Corona, P. Estimation of canopy attributes in beech forests using true colour digital images from a small fixed-wing UAV. *Int. J. Appl. Earth Obs. Geoinf.* **2016**, *47*, 60–68, doi:10.1016/j.jag.2015.12.005.
  102. Messinger, M.; Asner, G. P.; Silman, M. Rapid assessments of amazon forest structure and biomass using small unmanned aerial systems. *Remote Sens.* **2016**, *8*, doi:10.3390/rs8080615.
  103. Wahyuni, S.; Jaya, I. N. S.; Puspaningsih, N. Model for estimating above ground biomass of reclamation forest using unmanned aerial vehicles. *Indones. J. Electr. Eng. Comput. Sci.* **2016**, *4*, 586–593, doi:10.11591/ijeecs.v4.i3.pp586-593.
  104. Husson, E.; Ecke, F.; Reese, H. Comparison of manual mapping and automated object-based image analysis of non-submerged aquatic vegetation from very-high-resolution UAS images. *Remote Sens.* **2016**, *8*, doi:10.3390/rs8090724.
  105. Zhang, J.; Hu, J.; Lian, J.; Fan, Z.; Ouyang, X.; Ye, W. Seeing the forest from drones: Testing the potential of lightweight drones as a tool for long-term forest monitoring. *Biol. Conserv.* **2016**, *198*, 60–69, doi:10.1016/j.biocon.2016.03.027.
  106. Kachamba, D. J.; Ørka, H. O.; Gobakken, T.; Eid, T.; Mwase, W. Biomass estimation using 3D data from unmanned aerial vehicle imagery in a tropical woodland. *Remote Sens.* **2016**, *8*, 1–18, doi:10.3390/rs8110968.
  107. Sweeney, K. L.; Helker, V. T.; Perryman, W. L.; LeRoi, D. J.; Fritz, L. W.; Gelatt, T. S.; Angliss, R. P. Flying beneath the clouds at the edge of the world: using a hexacopter to supplement abundance surveys of Steller sea lions (*Eumetopias jubatus*) in Alaska. *J. Unmanned Veh. Syst.* **2016**, *4*, 70–81, doi:10.1139/juvs-2015-0010.
  108. Rümmler, M. C.; Mustafa, O.; Maercker, J.; Peter, H. U.; Esefeld, J. Measuring the influence of unmanned aerial vehicles on Adélie penguins. *Polar Biol.* **2016**, *39*, 1329–1334, doi:10.1007/s00300-015-1838-1.
  109. Cunliffe, A. M.; Brazier, R. E.; Anderson, K. Ultra-fine grain landscape-scale quantification of dryland vegetation structure with drone-acquired structure-from-motion photogrammetry. *Remote Sens. Environ.* **2016**, *183*, 129–143, doi:10.1016/j.rse.2016.05.019.
  110. Zielewska-Büttner, K.; Adler, P.; Ehmann, M.; Braunsch, V. Automated detection of forest gaps in spruce dominated stands using canopy height models derived from stereo aerial Imagery. *Remote Sens.* **2016**, *8*.
  111. Fraser, R. H.; Olthof, I.; Lantz, T. C.; Schmitt, C. UAV photogrammetry for mapping vegetation in the low-Arctic. *Arct. Sci.* **2016**, *2*, 79–102, doi:10.1139/as-2016-0008.
  112. Evans, L. J.; Jones, T. H.; Pang, K.; Saimin, S.; Goossens, B. Spatial ecology of estuarine crocodile (*Crocodylus porosus*) nesting in a fragmented landscape. *Sensors (Switzerland)* **2016**, *16*, doi:10.3390/s16091527.
  113. Guerra-Hernández, J.; González-Ferreiro, E.; Sarmento, A.; Silva, J.; Nunes, A.; Correia, A. C.; Fontes, L.; Tomé, M.; Díaz-Varela, R. Using high resolution UAV imagery to estimate tree variables in Pinus pinea plantation in Portugal. *For. Syst.* **2016**, *25*, doi:10.5424/fs/2016252-08895.
  114. Müllerová, J.; Brůna, J.; Dvořák, P.; Bartaloš, T.; Vítková, M. Does the data resolution/origin matter? Satellite, airborne and UAV imagery to tackle plant invasions. *Int. Arch. Photogramm. Remote Sens. Spat. Inf. Sci. - ISPRS Arch.* **2016**, *41*, 903–908, doi:10.5194/isprsarchives-XLI-B7-903-2016.
  115. Wallace, L.; Lucieer, A.; Malenovsky, Z.; Turner, D.; Vopěnka, P. Assessment of forest structure using two UAV techniques: A comparison of airborne laser scanning and structure from motion (SfM) point clouds. *Forests* **2016**, *7*, doi:10.3390/f7030062.
  116. Ballari, D.; Orellana, D.; Acosta, E.; Espinoza, A.; Moroch, V. Uav monitoring for enviromental management in galapagos islands, 2016, Vol. 2016–Janua.
  117. Marcaccio, J. V.; Markle, C. E.; Chow-Fraser, P. Use of fixed-wing and multi-rotor unmanned aerial vehicles to map dynamic changes in a freshwater marsh. *J. Unmanned Veh. Syst.* **2016**, *10*, juvs-2015-0016, doi:10.1139/juvs-2015-0016.
  118. Michez, A.; Piégay, H.; Jonathan, L.; Claessens, H.; Lejeune, P. Mapping of riparian invasive species with supervised classification of Unmanned Aerial System (UAS) imagery. *Int. J. Appl. Earth Obs. Geoinf.* **2016**, *44*, 88–94, doi:10.1016/j.jag.2015.06.014.
  119. Semeki, N. J.; Linchant, J.; Quevauvillers, S.; Muhongya, J. K.; Philippe, L.; Vermeulen, C. Cartographie de la dynamique de terroirs villageois à l' aide d ' un drone dans les aires protégées de la République démocratique du Congo. **2016**, *330*, 69–83.

120. Ventura, D.; Bruno, M.; Jona Lasinio, G.; Belluscio, A.; Ardizzone, G. A low-cost drone based application for identifying and mapping of coastal fish nursery grounds. *Estuar. Coast. Shelf Sci.* **2016**, *171*, doi:10.1016/j.ecss.2016.01.030.
121. Michez, A.; Morelle, K.; Lehaire, F.; Widar, J.; Authélet, M.; Vermeulen, C.; Lejeune, P.; Michez, A.; Morelle, K.; Lehaire, F.; Authélet, M.; Vermeulen, C.; Lejeune, P.; Widar, J. Use of unmanned aerial system to assess wildlife (Sus scrofa) damage to crops (Zea mays). *J. Unmanned Veh. Sys* **2016**, *4*, 266–275, doi:10.1139/juvs-2016-0014.
122. Nyamuryekung'E, S.; Cibils, A. F.; Estell, R. E.; Gonzalez, A. L. Use of an unmanned aerial vehicle - Mounted video camera to assess feeding behavior of raramuri criollo cows. *Rangel. Ecol. Manag.* **2016**, *69*, 386–389, doi:10.1016/j.rama.2016.04.005.
123. Messinger, M.; Silman, M. Unmanned aerial vehicles for the assessment and monitoring of environmental contamination: An example from coal ash spills. *Environ. Pollut.* **2016**, *218*, 889–894, doi:10.1016/j.envpol.2016.08.019.
124. Cruz, H.; Eckert, M.; Meneses, J.; Martínez, J. F. Efficient forest fire detection index for application in Unmanned Aerial Systems (UASs). *Sensors (Switzerland)* **2016**, *16*, doi:10.3390/s16060893.
125. Ivosevic, B.; Han, Y.-G.; Kwon, O. Monitoring butterflies with an unmanned aerial vehicle: current possibilities and future potentials. *J. Ecol. Environ.* **2017**, *41*, 12, doi:10.1186/s41610-017-0028-1.
126. Korczak-Abshire, M.; Kidawa, A.; Zmarz, A.; Storvold, R.; Karlsen, S. R.; Rodzewicz, M.; Chwedorzewska, K.; Znoj, A. Preliminary study on nesting Adelie penguins disturbance by unmanned aerial vehicles. *Ccamlr Sci.* **2016**, *23*, 1–16.
127. Durban, J. W.; Moore, M. J.; Chiang, G.; Hickmott, L. S.; Bocconcelli, A.; Howes, G.; Bahamonde, P. A.; Perryman, W. L.; LeRoi, D. J. Photogrammetry of blue whales with an unmanned hexacopter. *Mar. Mammal Sci.* **2016**, *32*, 1510–1515, doi:10.1111/mms.12328.
128. Șerban, G.; Rus, I.; Vele, D.; Brețcan, P.; Alexe, M.; Petrea, D. Flood-prone area delimitation using UAV technology, in the areas hard-to-reach for classic aircrafts: case study in the north-east of Apuseni Mountains, Transylvania. *Nat. Hazards* **2016**, *82*, 1817–1832, doi:10.1007/s11069-016-2266-4.
129. Gallik, J.; Bolešová, L. SUAS and their application in observing geomorphological processes. *Solid Earth* **2016**, *7*, 1033–1042, doi:10.5194/se-7-1033-2016.
130. Hruža, P.; Mikita, T.; Janata, P. Monitoring of forest hauling roads wearing course damage using unmanned aerial systems. *Acta Univ. Agric. Silv. Mendelianae Brun.* **2016**, *64*, 1537–1546, doi:10.11118/actaun201664051537.
131. Junda, J. H.; Greene, E.; Zazelenchuk, D.; Bird, D. M. Nest defense behaviour of four raptor species (osprey, bald eagle, ferruginous hawk, and red-tailed hawk) to a novel aerial intruder – a small rotary-winged drone. *J. Unmanned Veh. Syst.* **2016**, *4*, 217–227, doi:10.1139/juvs-2016-0004.
132. Shaffer, M. J.; Bishop, J. A. Predicting and Preventing Elephant Poaching Incidents through Statistical Analysis, GIS-Based Risk Analysis, and Aerial Surveillance Flight Path Modeling. *Trop. Conserv. Sci.* **2016**, *9*, 525–548, doi:10.1177/194008291600900127.
133. Chen, J.; Yi, S.; Qin, Y.; Wang, X. Improving estimates of fractional vegetation cover based on UAV in alpine grassland on the Qinghai–Tibetan Plateau. *Int. J. Remote Sens.* **2016**, *37*, 1922–1936, doi:10.1080/01431161.2016.1165884.
134. Gonçalves, J.; Henriques, R.; Alves, P.; Sousa-Silva, R.; Monteiro, A. T.; Lomba, Â.; Marcos, B.; Honrado, J. Evaluating an unmanned aerial vehicle-based approach for assessing habitat extent and condition in fine-scale early successional mountain mosaics. *Appl. Veg. Sci.* **2016**, *19*, 132–146, doi:10.1111/avsc.12204.
135. Kraaijenbrink, P. D. A.; Shea, J. M.; Pellicciotti, F.; Jong, S. M. d.; Immerzeel, W. W. Object-based analysis of unmanned aerial vehicle imagery to map and characterise surface features on a debris-covered glacier. *Remote Sens. Environ.* **2016**, *186*, 581–595, doi:10.1016/j.rse.2016.09.013.
136. Boon, M. A.; Greenfield, R.; Tesfamichael, S. Wetland Assessment Using Unmanned Aerial Vehicle (Uav) Photogrammetry. *ISPRS - Int. Arch. Photogramm. Remote Sens. Spat. Inf. Sci.* **2016**, *XLI-B1*, 781–788, doi:10.5194/isprsarchives-XLI-B1-781-2016.
137. Cruzan, M. B.; Weinstein, B. G.; Grasty, M. R.; Kohrn, B. F.; Hendrickson, E. C.; Arredondo, T. M.; Thompson, P. G. Small Unmanned Aerial Vehicles (Micro-Uavs, Drones) in Plant Ecology. *Appl. Plant Sci.* **2016**, *4*, 1600041, doi:10.3732/apps.1600041.
138. Papakonstantinou, A.; Topouzelis, K.; Pavlogeorgatos, G. Coastline Zones Identification and 3D Coastal Mapping Using UAV Spatial Data. *ISPRS Int. J. Geo-Information* **2016**, doi:10.3390/igi5060075.
139. McKenna, P.; Erskine, P. D.; Lechner, A. M.; Phinn, S. Measuring fire severity using UAV imagery in semi-arid central Queensland, Australia. *Int. J. Remote Sens.* **2017**, *38*, 4244–4264, doi:10.1080/01431161.2017.1317942.
140. Yuan, C.; Liu, Z.; Zhang, Y. Aerial Images-Based Forest Fire Detection for Firefighting Using Optical Remote Sensing Techniques and Unmanned Aerial Vehicles. *J. Intell. Robot. Syst. Theory Appl.* **2017**, 1–20.
141. Hardy, A.; Makame, M.; Cross, D.; Majambere, S.; Msellem, M. Using low-cost drones to map malaria vector habitats. *Parasit. Vectors* **2017**, *10*, 29, doi:10.1186/s13071-017-1973-3.
142. Popescu, D.; Ichim, L.; Stoican, F. Unmanned Aerial Vehicle Systems for Remote Estimation of Flooded Areas Based on Complex Image Processing. *Sensors* **2017**, *17*, 446, doi:10.3390/s17030446.
143. Chabot, D.; Dillon, C.; Ahmed, O.; Shemrock, A. Object-based analysis of UAS imagery to map emergent and submerged invasive aquatic vegetation: a case study. *J. Unmanned Veh. Syst.* **2017**, *5*, 27–33, doi:dx.doi.org/10.1139/juvs-2016-0009.
144. Malenovský, Z.; Lucieer, A.; King, D. H.; Turnbull, J. D.; Robinson, S. A. Unmanned aircraft system advances health mapping of fragile polar vegetation. *Methods Ecol. Evol.* **2017**.
145. Ahmed, O. S.; Shemrock, A.; Chabot, D.; Dillon, C.; Williams, G.; Wasson, R.; Franklin, S. E. Hierarchical land cover and vegetation classification using multispectral data acquired from an unmanned aerial vehicle. *Int. J. Remote Sens.* **2017**, *38*, 2037–2052, doi:10.1080/01431161.2017.1294781.
146. Coveney, S.; Roberts, K. Lightweight UAV digital elevation models and orthoimagery for environmental applications: data accuracy evaluation and potential for river flood risk modelling. *Int. J. Remote Sens.* **2017**, *38*, 3159–3180, doi:10.1080/01431161.2017.1292074.
147. Franklin, S. E.; Ahmed, O. S. Deciduous tree species classification using object-based analysis and machine learning with unmanned aerial vehicle multispectral data. *Int. J. Remote Sens.* **2017**, 1–10.
148. Cruz, H. O.; Eckert, M.; Meneses, J. M.; Martinez, J. F. Precise real-time detection of nonforested areas with UAVs. *IEEE Trans. Geosci. Remote Sens.* **2017**, *55*, 632–644, doi:10.1109/TGRS.2016.2612339.
149. Mayr, M. J.; Malß, S.; Ofner, E.; Samimi, C. Disturbance feedbacks on the height of woody vegetation in a savannah: a multi-plot assessment using an unmanned aerial vehicle (UAV). *Int. J. Remote Sens.* **2017**, 1–25.
150. Ivosevic, B.; Han, Y. G.; Kwon, O. Calculating coniferous tree coverage using unmanned aerial vehicle photogrammetry. *J. Ecol. Environ.* **2017**, *41*, 4–11, doi:10.1186/s41610-017-0029-0.

151. Fernández-Lozano, J.; Gutiérrez-Alonso, G. The Alejico Carboniferous Forest: a 3D-Terrestrial and UAV-Assisted Photogrammetric Model for Geologic Heritage Preservation. *Geoheritage* **2017**, *9*, 163–173, doi:10.1007/s12371-016-0193-0.
152. Puliti, S.; Ene, L. T.; Gobakken, T.; Næsset, E. Use of partial-coverage UAV data in sampling for large scale forest inventories. *Remote Sens. Environ.* **2017**, *194*, 115–126, doi:10.1016/j.rse.2017.03.019.
153. Martínez-de Dios, J.; de San Bernabé, A.; Viguria, A.; Torres-González, A.; Ollero, A. Combining Unmanned Aerial Systems and Sensor Networks for Earth Observation. *Remote Sens.* **2017**, *9*, 336, doi:10.3390/rs9040336.
154. Lishawa, S. C. Mechanical Harvesting Effectively Controls Young Typha spp. Invasion and Unmanned Aerial Vehicle Data Enhances Post-treatment Monitoring. **2017**, *8*, 1–14, doi:10.3389/fpls.2017.00619.
155. Hahn, N.; Mwakatobe, A.; Konuche, J.; de Souza, N.; Keyyu, J.; Goss, M.; Chang'a, A.; Palminteri, S.; Dinerstein, E.; Olson, D. Unmanned aerial vehicles mitigate human–elephant conflict on the borders of Tanzanian Parks: a case study. *Oryx* **2017**, *51*, 513–516, doi:10.1017/S0030605316000946.
156. Lyons, M.; Brandis, K.; Callaghan, C.; Mccann, J.; Mills, C.; Ryall, S.; Kingsford, R. Bird interactions with drones from individuals to large colonies. *bioRxiv* **2017**, 1–10, doi:10.1101/109926.
157. Longmore, S. N.; Collins, R. P.; Pfeifer, S.; Fox, S. E.; Mulero-Pazmany, M.; Bezombes, F.; Goodwin, A.; De Juan Ovelar, M.; Knapen, J. H.; Wich, S. A. Adapting astronomical source detection software to help detect animals in thermal images obtained by unmanned aerial systems. *Int. J. Remote Sens.* **2017**, *38*, 2623–2638, doi:10.1080/01431161.2017.1280639.
158. Van Tilburg, C.; Brown, S. T.; Ferguson, M.; al., et First Report of Using Portable Unmanned Aircraft Systems (Drones) for Search and Rescue. *Wilderness Environ. Med.* **2017**, *15*, 12, doi:10.1016/j.wem.2016.12.010.
159. Woodget, A. S.; Austrums, R.; Maddock, I. P.; Habit, E. Drones and digital photogrammetry: from classifications to continuums for monitoring river habitat and hydromorphology. *Wiley Interdiscip. Rev. Water* **2017**, *4*, e1222, doi:10.1002/wat2.1222.
160. O. W. Van Auken; Taylor, D. L. Using a Drone (UAV) to Determine the Acer grandidentatum (bigtooth maple) Density in a Relic, Isolated Community. *Phytologia* **2017**, *99*, 208–220.
161. Stark, D. J.; Vaughan, I. P.; Evans, L. J.; Kler, H.; Goossens, B. Combining drones and satellite tracking as an effective tool for informing policy change in riparian habitats: A proboscis monkey case study. *Remote Sens. Ecol. Conserv.* **2017**, 1–9, doi:10.1002/rse2.51.
162. Senthilnath, J.; Kandukuri, M.; Dokania, A.; Ramesh, K. N. Application of UAV imaging platform for vegetation analysis based on spectral-spatial methods. *Comput. Electron. Agric.* **2017**, *140*, 8–24, doi:10.1016/j.compag.2017.05.027.
163. Szantoi, Z.; Smith, S. E.; Strona, G.; Koh, L. P.; Wich, S. A. Mapping orangutan habitat and agricultural areas using Landsat OLI imagery augmented with unmanned aircraft system aerial photography. *Int. J. Remote Sens.* **2017**, *38*, 1–15, doi:10.1080/01431161.2017.1280638.
164. Andrew, M. E.; Shephard, J. M. Semi-automated detection of eagle nests: an application of very high-resolution image data and advanced image analyses to wildlife surveys. **2017**, doi:10.1002/rse2.38.
165. Pande-Chhetri, R.; Abd-Elrahman, A.; Liu, T.; Morton, J.; Wilhelm, V. L. Object-based classification of wetland vegetation using very high-resolution unmanned air system imagery. *Eur. J. Remote Sens. ISSNOnline J. Eur. J. Remote Sens.* **2017**, *50*, 2279–2254, doi:10.1080/22797254.2017.1373602.
166. Hird, J. N.; Montaghi, A.; McDermid, G. J.; Kariyeva, J.; Moorman, B. J.; Nielsen, S. E.; McIntosh, A. C. S. Use of unmanned aerial vehicles for monitoring recovery of forest vegetation on petroleum well sites. *Remote Sens.* **2017**, *9*, doi:10.3390/rs9050413.
167. Lu, B.; He, Y. Species classification using Unmanned Aerial Vehicle (UAV)-acquired high spatial resolution imagery in a heterogeneous grassland. *ISPRS J. Photogramm. Remote Sens.* **2017**, *128*, 73–85, doi:10.1016/j.isprsjprs.2017.03.011.
168. Mlambo, R.; Woodhouse, I. H.; Gerard, F.; Anderson, K. Structure from motion (SfM) photogrammetry with drone data: A low cost method for monitoring greenhouse gas emissions from forests in developing countries. *Forests* **2017**, *8*, doi:10.3390/f8030068.
169. Mafanya, M.; Tsele, P.; Botai, J.; Manyama, P.; Swart, B.; Monate, T. Evaluating pixel and object based image classification techniques for mapping plant invasions from UAV derived aerial imagery: Harrisia pomanensis as a case study. *ISPRS J. Photogramm. Remote Sens.* **2017**, *129*, 1–11, doi:10.1016/j.isprsjprs.2017.04.009.
170. Wang, D.; Xin, X.; Shao, Q.; Brolly, M.; Zhu, Z.; Chen, J. Modeling aboveground biomass in Hulunber grassland ecosystem by using unmanned aerial vehicle discrete lidar. *Sensors (Switzerland)* **2017**, *17*, 1–19, doi:10.3390/s17010180.
171. Murfitt, S. L.; Allan, B. M.; Bellgrove, A.; Rattray, A.; Young, M. A.; Ierodiakonou, D. Applications of unmanned aerial vehicles in intertidal reef monitoring. *Sci. Rep.* **2017**, *7*, 10259, doi:10.1038/s41598-017-10818-9.
172. Tian, J.; Wang, L.; Li, X.; Gong, H.; Shi, C.; Zhong, R.; Liu, X. Comparison of UAV and WorldView-2 imagery for mapping leaf area index of mangrove forest. *Int. J. Appl. Earth Obs. Geoinf.* **2017**, *61*, 22–31, doi:10.1016/j.jag.2017.05.002.
173. Karaca, Y.; Cicek, M.; Tatli, O.; Sahin, A.; Pasli, S.; Beser, M. F.; Turedi, S. The potential use of unmanned aircraft systems (drones) in mountain search and rescue operations. *Am. J. Emerg. Med.* **2017**, doi:10.1016/j.ajem.2017.09.025.
174. Bonnet, S.; Lisein, J.; Lejeune, P. Comparison of UAS photogrammetric products for tree detection and characterization of coniferous stands detection and characterization of coniferous stands. *Int. J. Remote Sens.* **2017**, *38*, 5310–5337, doi:10.1080/01431161.2017.1338839.
175. Lu, B.; He, Y.; Liu, H. H. T. Mapping vegetation biophysical and biochemical properties using unmanned aerial vehicles-acquired imagery. *Int. J. Remote Sens.* **2017**, 1–23, doi:10.1080/01431161.2017.1363441.
176. Perroy, R. L.; Sullivan, T.; Stephenson, N. Assessing the impacts of canopy openness and flight parameters on detecting a sub-canopy tropical invasive plant using a small unmanned aerial system. *ISPRS J. Photogramm. Remote Sens.* **2017**, *125*, 174–183, doi:10.1016/j.isprsjprs.2017.01.018.
177. Guerra-Hernández, J.; González-Ferreiro, E.; Monleón, V. J.; Faias, S. P.; Tomé, M.; Díaz-Varela, R. A. Use of multi-temporal UAV-derived imagery for estimating individual tree growth in Pinus pinea stands. *Forests* **2017**, *8*, doi:10.3390/f8080300.
178. Koparan, C.; Koc, A. B. Development of a UAV-Assisted Water Quality Measurement System. In: {ASABE} {Paper} {No}. 1701352; ASABE, 2017; p. 1.
179. Mokroš, M.; Výboštok, J.; Merganič, J.; Hollaus, M.; Barton, I.; Koreň, M.; Tomašík, J.; Čerňava, J. Early stage forest windthrow estimation based on unmanned aircraft system imagery. *Forests* **2017**, *8*, doi:10.3390/f8090306.
180. Mohan, M.; Silva, C.; Klauberg, C.; Jat, P.; Catts, G.; Cardil, A.; Hudak, A.; Dia, M. Individual Tree Detection from Unmanned Aerial Vehicle (UAV) Derived Canopy Height Model in an Open Canopy Mixed Conifer Forest. *Forests* **2017**, *8*, 340, doi:10.3390/f8090340.
181. Jarrod Hodgson, A. C.; Mott, R.; Baylis, S. M.; Pham, T. T.; Wotherspoon, S.; Kilpatrick, A. D.; Raja Segaran, R.; Reid, I.; Terauds, A.; Pin Koh, L.; Hodgson, J. C.

Drones count wildlife more accurately and precisely than humans. **2017**, 27, 8875, doi:10.1101/165019.

182. Duan, F.; Wan, Y.; Deng, L. A novel approach for coarse-to-fine windthrown tree extraction based on unmanned aerial vehicle images. *Remote Sens.* **2017**, 9, doi:10.3390/rs9040306.
183. G.Chirico, P.; D.DeWitt, J. Mapping informal small-scale mining features in a data-sparse tropical environment with a small UAS. *J. Unmanned Veh. Syst.* **2017**, 5, 69–91, doi:10.1139/juvs-2017-0002.
184. Zaragoza, I. M.; Caroti, G.; Piemonte, A.; Tengen, D.; Niemeier, W.; Zaragoza, I. M.; Caroti, G.; Piemonte, A. Structure from motion ( SfM ) processing of UAV images and combination with terrestrial laser scanning , applied for a 3D-documentation in a hazardous situation. **2017**, 5705, doi:10.1080/19475705.2017.1345796.
185. Sardà-Palamera, F.; Bota, G.; Padilla, N.; Brotons, L.; Sardà, F. Unmanned aircraft systems to unravel spatial and temporal factors affecting dynamics of colony formation and nesting success in birds. *J. Avian Biol.* **2017**, doi:10.1111/jav.01535.
186. Müllerová, J.; Bartaloš, T.; Brúna, J.; Dvořák, P.; Vítková, M. Unmanned aircraft in nature conservation: an example from plant invasions. *Int. J. Remote Sens.* **2017**, 38, 2177–2198, doi:10.1080/01431161.2016.1275059.
187. Lopatin, E.; Lopatina, A. Assessing and mapping energy biomass distribution using a UAV in Finland. *Biofuels* **2017**, 8, 485–499, doi:10.1080/17597269.2017.1302663.
188. Müllerová, J.; Brúna, J.; Bartaloš, T.; Dvořák, P.; Vítková, M.; Pyšek, P. Timing Is Important: Unmanned Aircraft vs. Satellite Imagery in Plant Invasion Monitoring. *Front. Plant Sci.* **2017**, 8, doi:10.3389/fpls.2017.00887.
189. Lehmann, J. R. K.; Prinz, T.; Ziller, S. R.; Thiele, J.; Heringer, G.; Meira-Neto, J. A. A.; Buttschardt, T. K. Open-Source Processing and Analysis of Aerial Imagery Acquired with a Low-Cost Unmanned Aerial System to Support Invasive Plant Management. *Front. Environ. Sci.* **2017**, 5, doi:10.3389/fenvs.2017.00044.
190. Alvarez-taboada, F.; Paredes, C.; Julián-Pelaz, J. Mapping of the Invasive Species Hakea sericea Using Unmanned Aerial Vehicle ( UAV ) and WorldView-2 Imagery and an Object-Oriented Approach. *Remote Sens.* **2017**, 9, 1–17, doi:10.3390/rs9090913.
191. Hodgson, A.; Peel, D.; Kelly, N. Unmanned aerial vehicles for surveying marine fauna: assessing detection probability. *Ecol. Appl.* **2017**, 27, 1253–1267, doi:10.1002/eap.1519.
192. Yi, S. FragMAP: a tool for long-term and cooperative monitoring and analysis of small-scale habitat fragmentation using an unmanned aerial vehicle. *Int. J. Remote Sens.* **2017**, 38, 2686–2697, doi:10.1080/01431161.2016.1253898.
193. Husson, E.; Reese, H.; Ecke, F. Combining spectral data and a DSM from UAS-images for improved classification of non-submerged aquatic vegetation. *Remote Sens.* **2017**, 9, doi:10.3390/rs9030247.
194. Dempewolf, J.; Nagol, J.; Hein, S.; Thiel, C.; Zimmermann, R. Measurement of within-season tree height growth in a mixed forest stand using UAV imagery. *Forests* **2017**, 8, doi:10.3390/f8070231.
195. Bedell, E.; Leslie, M.; Fankhauser, K.; Burnett, J.; Wing, M. G.; Thomas, E. A. Unmanned aerial vehicle-based structure from motion biomass inventory estimates. *J. Appl. Remote Sens.* **2017**, 11, 026026, doi:10.1117/1.JRS.11.026026.
196. Casella, E.; Collin, A.; Harris, D.; Ferse, S.; Bejarano, S.; Parravicini, V.; Hench, J. L.; Rovere, A. Mapping coral reefs using consumer-grade drones and structure from motion photogrammetry techniques. *Coral Reefs* **2017**, 36, 269–275, doi:10.1007/s00338-016-1522-0.
197. Panagiotidis, D.; Abdollahnejad, A.; Surov??, P.; Chiteculo, V. Determining tree height and crown diameter from high-resolution UAV imagery. *Int. J. Remote Sens.* **2017**, 38, 2392–2410, doi:10.1080/01431161.2016.1264028.
198. Konar, B.; Iken, K. The use of unmanned aerial vehicle imagery in intertidal monitoring, Deep-Sea Research Part II. *Deep. Res. Part II Top. Stud. Oceanogr.* **2017**, doi:10.1016/j.dsr2.2017.04.010.
199. Vi, C.; Vi, W. G. COMPARISON OF A FIXED-WING AND MULTI-ROTOR UAV FOR ENVIRONMENTAL MAPPING APPLICATIONS : A CASE STUDY. **2017**, XLII, 4–7.
200. Izumida, A.; Uchiyama, S.; Sugai, T. Application of UAV-SfM photogrammetry and aerial LiDAR to a disastrous flood: multitemporal topographic measurement of a newly formed crevasse splay of the Kinu River, central Japan. *Nat. Hazards Earth Syst. Sci. Discuss.* **2016**, 1–22, doi:10.5194/nhess-2017-42.
201. Alvear, O.; Zema, N. R.; Natalizio, E.; Calafate, C. T. Using UAV-based systems to monitor air pollution in areas with poor accessibility. *J. Adv. Transp.* **2017**, 2017, doi:10.1155/2017/8204353.
202. Seymour, A. C.; Dale, J.; Hammill, M.; Halpin, P. N.; Johnston, D. W. Automated detection and enumeration of marine wildlife using unmanned aircraft systems (UAS) and thermal imagery. *Sci. Rep.* **2017**, 7, 45127, doi:10.1038/srep45127.
203. Sankey, T.; Donager, J.; McVay, J.; Sankey, J. B. UAV lidar and hyperspectral fusion for forest monitoring in the southwestern USA. *Remote Sens. Environ.* **2017**, 195, 30–43, doi:10.1016/j.rse.2017.04.007.
204. Wilson, A. M.; Barr, J.; Zagorski, M. The feasibility of counting songbirds using unmanned aerial vehicles. *Auk* **2017**, 134, 350–362, doi:10.1642/AUK-16-216.1.
205. Tremblay, J. A.; Desrochers, A.; Aubry, Y.; Pace, P.; Bird, D. M. A Low-Cost Technique for Radio-Tracking Wildlife Using a Small Standard Unmanned Aerial Vehicle. *J. Unmanned Veh. Syst.* **2017**, juvs-2016-0021, doi:10.1139/juvs-2016-0021.
206. Schofield, G.; Katselidis, K. A.; Lilley, M. K. S.; Reina, R. D.; Hays, G. C. Detecting elusive aspects of wildlife ecology using drones: new insights on the mating dynamics and operational sex ratios of sea turtles. *Funct. Ecol.* **2017**, 38, 42–49, doi:10.1111/1365-2435.12930.
207. Weber, S.; Knaus, F. Using drones as a monitoring tool to detect evidence of winter sports activities in a protected mountain area. *Eco.mont* **2017**, 9, 30–34, doi:10.1553/eco.mont-9-1s30.
208. Weimerskirch, H.; Prudor, A.; Schull, Q. Flights of drones over sub-Antarctic seabirds show species- and status-specific behavioural and physiological responses. *Polar Biol.* **2017**, doi:10.1007/s00300-017-2187-z.
209. Park, K.; Ewing, R. The usability of unmanned aerial vehicles (UAVs) for measuring park-based physical activity. *Landsc. Urban Plan.* **2017**, 167, 157–164, doi:10.1016/j.landurbplan.2017.06.010.
210. Chamata, J. E.; King, L. M. The Commercial Use of Drones in U.S. National Parks. *Int. Technol. Manag. Rev.* **2017**, 6, 158–164.
211. Rey, N.; Volpi, M.; Joost, S.; Tuia, D. Detecting animals in African Savanna with UAVs and the crowds. *Remote Sens. Environ.* **2017**, 200, 341–351, doi:10.1016/j.rse.2017.08.026.
212. Adame, K.; Pardo, M. A.; Salvadeo, C.; Beier, E.; Elorriaga-Verplancken, F. R. Detectability and categorization of California sea lions using an unmanned aerial vehicle. *Mar. Mammal Sci.* **2017**, 33, 913–925, doi:10.1111/mms.12403.



213. Kalacska, M.; Chmura, G. L.; Lucanus, O.; Bérubé, D.; Arroyo-Mora, J. P. Structure from motion will revolutionize analyses of tidal wetland landscapes. *Remote Sens. Environ.* **2017**, *199*, 14–24, doi:10.1016/j.rse.2017.06.023.
214. Pomeroy, P.; O'Connor, L.; Davies, P. Assessing use of and reaction to unmanned aerial systems in gray and harbor seals during breeding and molt in the UK. *J. Unmanned Veh. Syst.* **2015**, *3*, 102–113, doi:10.1139/juvs-2015-0013.
215. Franklin, S. E.; Ahmed, O. S.; Williams, G. Northern Conifer Forest Species Classification Using Multispectral Data Acquired from an Unmanned Aerial Vehicle. *Photogramm. Eng. Remote Sens.* **2017**, *83*, 501–507, doi:10.14358/PERS.83.7.501.
216. Hengstmann, E.; Gräwe, D.; Tammenga, M.; Fischer, E. K. Marine litter abundance and distribution on beaches on the Isle of Rügen considering the influence of exposition, morphology and recreational activities. *Mar. Pollut. Bull.* **2017**, *115*, 297–306, doi:10.1016/j.marpolbul.2016.12.026.
217. Pirotta, V.; Smith, A.; Ostrowski, M.; Russell, D.; Jonsen, I. D.; Grech, A.; Harcourt, R. An Economical Custom-Built Drone for Assessing Whale Health. *Front. Mar. Sci.* **2017**, *4*, 1–12, doi:10.3389/fmars.2017.00425.
218. Apprill, A.; Miller, C. A.; Moore, M. J.; Durban, J. W.; Fearnbach, H.; Barrett-Lennard, L. G. Extensive Core Microbiome in Drone-Captured Whale Blow Supports a Framework for Health Monitoring. *mSystems* **2017**, doi:10.1128/mSystems.00119-17.
219. Seier, G.; Kellerer-Pirklbauer, A.; Wecht, M.; Hirschmann, S.; Kaufmann, V.; Lieb, G. K.; Sulzer, W. UAS-based change detection of the glacial and proglacial transition zone at Pasterze Glacier, Austria. *Remote Sens.* **2017**, doi:10.3390/rs9060549.
220. Han, Y. G.; Yoo, S. H.; Kwon, O. Possibility of applying unmanned aerial vehicle (UAV) and mapping software for the monitoring of waterbirds and their habitats. *J. Ecol. Environ.* **2017**, *41*, 1–7, doi:10.1186/s41610-017-0040-5.
221. Hill, D. J.; Tarasoff, C.; Whitworth, G. E.; Baron, J.; Bradshaw, J. L.; Church, J. S. Utility of unmanned aerial vehicles for mapping invasive plant species: a case study on yellow flag iris (*Iris pseudacorus* L.). *Int. J. Remote Sens.* **2017**, *38*, 2083–2105, doi:10.1080/01431161.2016.1264030.
222. Greatwood, C.; Richardson, T. S.; Freer, J.; Thomas, R. M.; Rob Mackenzie, A.; Brownlow, R.; Lowry, D.; Fisher, R. E.; Nisbet, E. G. Atmospheric sampling on ascension island using multirotor UAVs. *Sensors (Switzerland)* **2017**, doi:10.3390/s17061189.
223. Guo, Q.; Su, Y.; Hu, T.; Zhao, X.; Wu, F.; Li, Y.; Liu, J.; Chen, L.; Xu, G.; Lin, G.; Zheng, Y.; Lin, Y.; Mi, X.; Fei, L.; Wang, X. An integrated UAV-borne lidar system for 3D habitat mapping in three forest ecosystems across China. *Int. J. Remote Sens.* **2017**, *38*, 2954–2972, doi:10.1080/01431161.2017.1285083.
224. Faye, E.; Rebaudo, F.; Yáñez-Cajo, D.; Cauvy-Fraunié, S.; Dangles, O. A toolbox for studying thermal heterogeneity across spatial scales: From unmanned aerial vehicle imagery to landscape metrics. *Methods Ecol. Evol.* **2016**, doi:10.1111/2041-210X.12488.
225. Martin, C.; Parkes, S.; Zhang, Q.; Zhang, X.; McCabe, M. F.; Duarte, C. M. Use of unmanned aerial vehicles for efficient beach litter monitoring. *Mar. Pollut. Bull.* **2018**, *131*, 662–673, doi:10.1016/j.marpolbul.2018.04.045.
226. Bevan, E.; Whiting, S.; Tucker, T.; Guinea, M.; Raith, A.; Douglas, R. Measuring behavioral responses of sea turtles, saltwater crocodiles, and crested terns to drone disturbance to define ethical operating thresholds. *PLoS One* **2018**, *13*, 1–17, doi:10.1371/journal.pone.0194460.
227. Ramos, E. A.; Maloney, B. M.; Magnasco, M. O.; Reiss, D. Bottlenose Dolphins and Antillean Manatees Respond to Small Multi-Rotor Unmanned Aerial Systems. *Front. Mar. Sci.* **2018**, *5*, 316, doi:10.3389/fmars.2018.00316.
228. Ventura, D.; Bonifazi, A.; Gravina, M. F.; Belluscio, A.; Ardizzone, G. Mapping and Classification of Ecologically Sensitive Marine Habitats Using Unmanned Aerial Vehicle (UAV) Imagery and Object-Based Image Analysis (OBIA). *Remote Sens.* **2018**, *10*, 1331, doi:10.3390/rs10091331.
229. Torres, L. G.; Nieukirk, S. L.; Lemos, L.; Chandler, T. E. Drone Up! Quantifying Whale Behavior From a New Perspective Improves Observational Capacity. *Front. Mar. Sci.* **2018**, *5*, 1–14, doi:10.3389/fmars.2018.00319.
230. Deidun, A.; Gauci, A.; Lagorio, S.; Galgani, F. Optimising beached litter monitoring protocols through aerial imagery. *Mar. Pollut. Bull.* **2018**, *131*, 212–217, doi:10.1016/j.marpolbul.2018.04.033.
231. Arefin, A. M. E. Proposal of a marine protected area surveillance system against illegal vessels using image sensing and image processing. *Acta Ecol. Sin.* **2018**, doi:10.1016/j.chnaes.2017.06.015.
232. Lorah, P.; Ready, A.; Rinn, E. Using Drones to Generate New Data for Conservation Insights. *Int. J. Geospatial Environ. Res.* **2018**, *5*.
233. Bonnin, N.; Van Andel, A.; Kerby, J.; Piel, A.; Pintea, L.; Wich, S. Assessment of Chimpanzee Nest Detectability in Drone-Acquired Images. *Drones* **2018**, *2*, 17, doi:10.3390/drones2020017.
234. Kellenberger, B.; Marcos, D.; Tuia, D. Detecting mammals in UAV images: Best practices to address a substantially imbalanced dataset with deep learning. *Remote Sens. Environ.* **2018**, *216*, 139–153, doi:10.1016/j.rse.2018.06.028.
235. Rossi, G.; Tanteri, L.; Tofani, V.; Vannocci, P.; Moretti, S.; Casagli, N. Multitemporal UAV surveys for landslide mapping and characterization. *Landslides* **2018**, *15*, 1045–1052, doi:10.1007/s10346-018-0978-0.
236. Tóth, V. R. Monitoring Spatial Variability and Temporal Dynamics of Phragmites Using Unmanned Aerial Vehicles. *Front. Plant Sci.* **2018**, *9*, 1–11, doi:10.3389/fpls.2018.00728.
237. van Iersel, W.; Straatsma, M.; Middelkoop, H.; Addink, E. Multitemporal Classification of River Floodplain Vegetation Using Time Series of UAV Images. *Remote Sens.* **2018**, *10*, 1144, doi:10.3390/rs10071144.
238. Zhao, Y.; Ma, J.; Li, X.; Zhang, J. Saliency detection and deep learning-based wildfire identification in uav imagery. *Sensors (Switzerland)* **2018**, *18*, doi:10.3390/s18030712.
239. Laguna, E.; Barasona, J. A.; Triguero-Ocaña, R.; Mulero-Pázmány, M.; Negro, J. J.; Vicente, J.; Acevedo, P. The relevance of host overcrowding in wildlife epidemiology: A new spatially explicit aggregation index. *Ecol. Indic.* **2018**, *84*, 695–700, doi:10.1016/j.ecolind.2017.09.039.
240. Koparan, C.; Koc, A. B.; Privette, C. V.; Sawyer, C. B.; Sharp, J. L. Evaluation of a UAV-assisted autonomous water sampling. *Water (Switzerland)* **2018**, *10*, doi:10.3390/w10050655.
241. Aniceto, A. S.; Biuw, M.; Lindstrøm, U.; Solbø, S. A.; Broms, F.; Carroll, J. Monitoring marine mammals using unmanned aerial vehicles: Quantifying detection certainty. *Ecosphere* **2018**, *9*, doi:10.1002/ecs2.2122.
242. Parsons, M.; Bratanov, D.; Gaston, K. J.; Gonzalez, F. UAVs, hyperspectral remote sensing, and machine learning revolutionizing reef monitoring. *Sensors (Switzerland)* **2018**, *18*, 1–20, doi:10.3390/s18072026.
243. NAGAI, S.; Taku M. SAITOH; KAJIWARA, K.; YOSHITAKE, S.; HONDA, Y. Investigation of the potential of drone observations for detection of forest disturbance caused by heavy snow damage in a Japanese cedar (*Cryptomeria japonica*) forest. *J. Agric. Meteorol.* **2018**, *74*, 123–127, doi:10.2480/agrmet.D-17-00038.

244. Borowicz, A.; McDowall, P.; Youngflesh, C.; Sayre-Mccord, T.; Clucas, G.; Herman, R.; Forrest, S.; Rider, M.; Schwaller, M.; Hart, T.; Jenouvrier, S.; Polito, M. J.; Singh, H.; Lynch, H. J. Multi-modal survey of Adélie penguin mega-colonies reveals the Danger Islands as a seabird hotspot. *Sci. Rep.* **2018**, *8*, 1–9, doi:10.1038/s41598-018-22313-w.
245. Gonçalves, G. R.; Pérez, J. A.; Duarte, J. Accuracy and effectiveness of low cost UASs and open source photogrammetric software for foredunes mapping. *Int. J. Remote Sens.* **2018**, *39*, 5059–5077, doi:10.1080/01431161.2018.1446568.
246. Otero, V.; Van De Kerchove, R.; Satyanarayana, B.; Martínez-Espinosa, C.; Fisol, M. A. Bin; Ibrahim, M. R. Bin; Sulong, I.; Mohd-Lokman, H.; Lucas, R.; Dahdouh-Guebas, F. Managing mangrove forests from the sky: Forest inventory using field data and Unmanned Aerial Vehicle (UAV) imagery in the Matang Mangrove Forest Reserve, peninsular Malaysia. *For. Ecol. Manage.* **2018**, *411*, 35–45, doi:10.1016/j.foreco.2017.12.049.
247. Koparan, C.; Koc, A. B.; Privette, C. V.; Sawyer, C. B. In Situ Water Quality Measurements Using an Unmanned Aerial Vehicle (UAV) System. *Water* **2018**, *10*, 264, doi:10.3390/w10030264.
248. Guo, X.; Shao, Q.; Li, Y.; Wang, Y.; Wang, D.; Liu, J.; Fan, J.; Yang, F. Application of UAV Remote Sensing for a Population Census of Large Wild Herbivores—Taking the Headwater Region of the Yellow River as an Example. *Remote Sens.* **2018**, *10*, 1041, doi:10.3390/rs10071041.
249. Olsoy, P. J.; Shipley, L. A.; Rachlow, J. L.; Forbey, J. S.; Glenn, N. F.; Burgess, M. A.; Thornton, D. H. Unmanned aerial systems measure structural habitat features for wildlife across multiple scales. *Methods Ecol. Evol.* **2018**, doi:10.1111/2041-210X.12919.
250. Thapa, G. J.; Thapa, K.; Thapa, R.; Jnawali, S. R.; Wich, S. A.; Poudyal, L. P.; Karki, S. Counting crocodiles from the sky: monitoring the critically endangered gharial (*Gavialis gangeticus*) population with an unmanned aerial vehicle (UAV). *J. Unmanned Veh. Syst.* **2018**, *6*, 71–82, doi:10.1139/juvs-2017-0026.
251. Toonen, H. M.; Bush, S. R. The digital frontiers of fisheries governance: fish attraction devices, drones and satellites. *J. Environ. Policy Plan.* **2018**, *0*, 1–13, doi:10.1080/1523908X.2018.1461084.
252. Kim, H. G.; Park, J.-S.; Lee, D.-H. Potential of Unmanned Aerial Sampling for Monitoring Insect Populations in Rice Fields. *Florida Entomol.* — **2018**, *101*, 330–334, doi:10.1653/024.101.0229.
253. Tay, J. Y. L.; Erfmeier, A.; Kalwij, J. M. Reaching new heights: can drones replace current methods to study plant population dynamics? *Plant Ecol.* **2018**, *8*, doi:10.1007/s11258-018-0865-8.
254. Ezat, M. A.; Fritsch, C. J.; Downs, C. T. Use of an unmanned aerial vehicle (drone) to survey Nile crocodile populations: A case study at Lake Nyamithi, Ndumo game reserve, South Africa. *Biol. Conserv.* **2018**, *223*, 76–81, doi:10.1016/j.biocon.2018.04.032.
255. Alexander, C.; Korstjens, A. H.; Hankinson, E.; Usher, G.; Harrison, N.; Nowak, M. G.; Abdullah, A.; Wich, S. A.; Hill, R. A. Locating emergent trees in a tropical rainforest using data from an Unmanned Aerial Vehicle (UAV). *Int. J. Appl. Earth Obs. Geoinf.* **2018**, *72*, 86–90, doi:10.1016/j.jag.2018.05.024.
256. Rieucan, G.; Kiszka, J. J.; Castillo, J. C.; Mourier, J.; Boswell, K. M.; Heithaus, M. R. Using unmanned aerial vehicle (UAV) surveys and image analysis in the study of large surface-associated marine species: a case study on reef sharks *Carcharhinus melanopterus* shoaling behaviour. *J. Fish Biol.* **2018**, doi:10.1111/jfb.13645.
257. Török, Á.; Barsi, Á.; Bögöly, G.; Lovas, T.; Somogyi, Á.; Görög, P. Slope stability and rockfall assessment of volcanic tuffs using RPAS with 2-D FEM slope modelling. *Nat. Hazards Earth Syst. Sci.* **2018**, doi:10.5194/nhess-18-583-2018.
