# Supplementary material
Source: MDPI journal article supplement (https://www.mdpi.com/2504-446X/3/1/10)
Supplement: s1 [file s1]

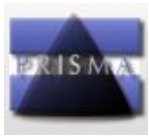

**Figure S1. PRISMA 2009 Flow Diagram**

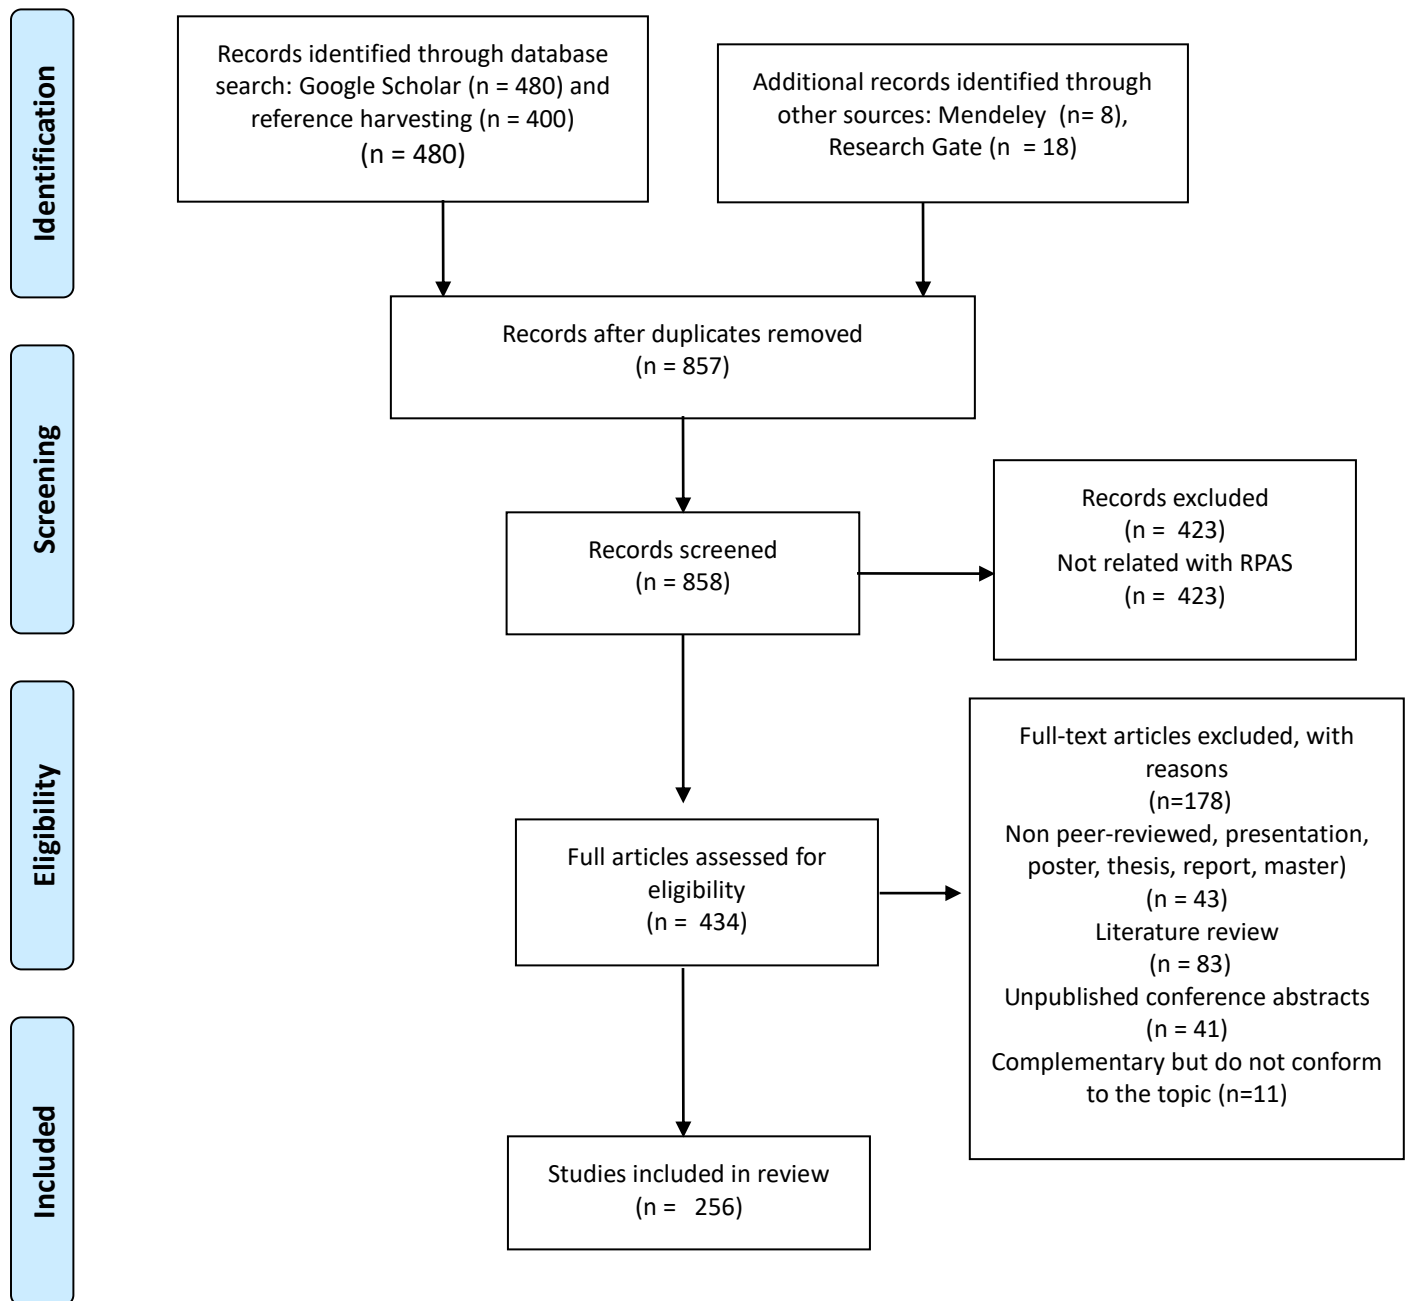

From: Moher D, Liberati A, Tetzlaff J, Altman DG, The PRISMA Group (2009). *Preferred Reporting Items for Systematic Reviews and Meta-Analyses: The PRISMA Statement*. PLoS Med 6(7): e1000097. doi:10.1371/journal.pmed1000097

For more information, visit [www.prisma-statement.org](http://www.prisma-statement.org).
